# Supplementary material
Source: PubMed Central journal article supplement (PMC9017122)
Supplement: mmc1.pdf [file mmc1.pdf]

**Cell Reports Methods, Volume 1**

**Supplemental information**

**Toward reproducible, scalable, and robust data  
analysis across multiplex tissue imaging platforms**

**Erik A. Burlingame, Jennifer Eng, Guillaume Thibault, Koei Chin, Joe W. Gray, and Young  
Hwan Chang**

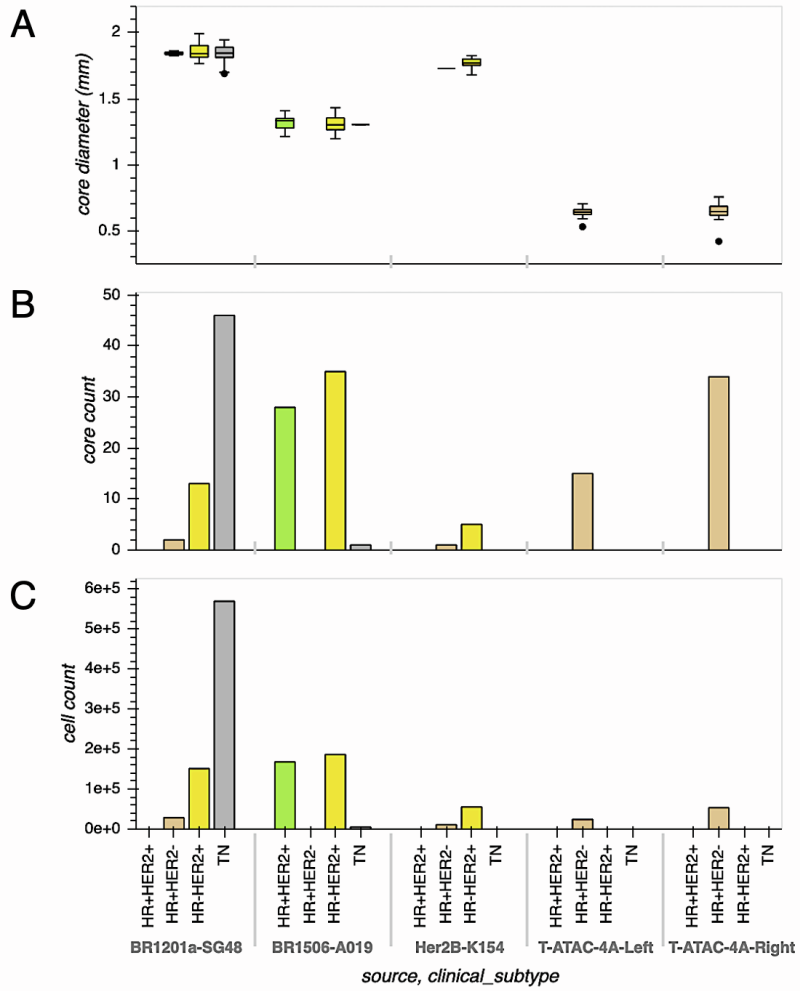

**Figure S1. Overview of TMA composition and CyCIF panel. Related to Figure 1.**

(A) Core diameters split by TMA source and BC subtype. Lines in boxes indicate the medians and whiskers indicate data within  $1.5 \times$  interquartile range of the upper and lower quartiles. Outliers are shown as distinct points.

(B) Core count split by TMA source and BC subtype. (C) Cell count split by TMA source and BC subtype.

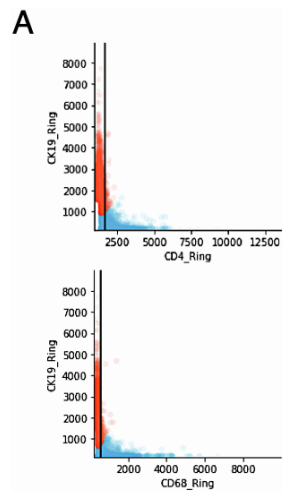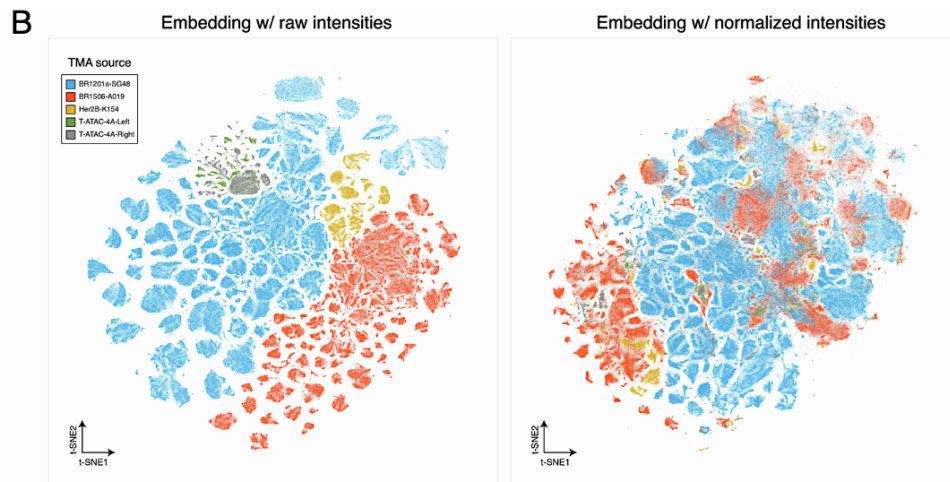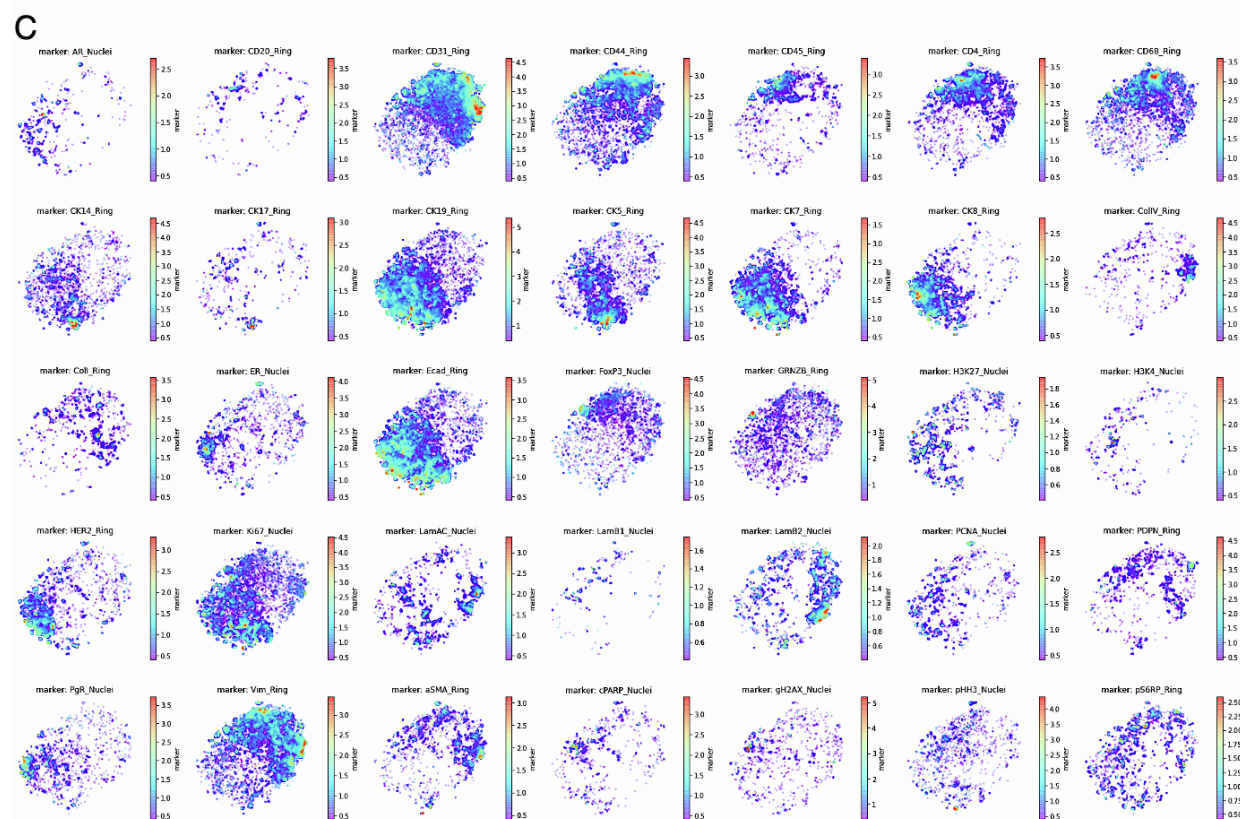

**Figure S2. Cell mean intensity normalization enables batch compilation of TMA data. Related to Figure 1 and STAR Methods.**

(A) Example of RESTORE normalization (Chang et al., 2020) of CD4 and CD68 cell mean intensities for a single TMA core. Cell mean intensities of these immune markers are plotted against the cell mean intensity of epithelial CK19, a mutually exclusive marker. Cells are partitioned into positive (blue) and negative (red) populations. Black lines represent the computed normalization factors. Cells to the right of each line are above the background intensity level for that immune marker. (B) *t*-SNE embeddings of all cells using either raw (left) or normalized (right) cell mean intensities for all markers. Cells are colored according to the TMA from which they originate. A strong batch effect is observed before normalization, leading to partitioning according to TMA of origin. Following normalization, cell phenotypes shared between TMAs are co-localized. However, some TMA-specific partitioning remains due to subtype-specific marker bias within TMAs. The coordinates used in the *t*-SNE plots at right are the same as those used in Figure 1B, where cells are colored by metacluster. In the plot in Figure 1B, it is clear that the HR+ and HER2+ tumor cells aggregated in the lower left correspond to the HR+ and HER2+ TMA cores from the BR1506, Her2B, and T-ATAC cohorts from Figure S2B. (C) *t*-SNE normalized embedding, faceted by marker, showing only cells that have a mean intensity above the normalization factor for that marker. Color scale is log-transformed normalized intensity.

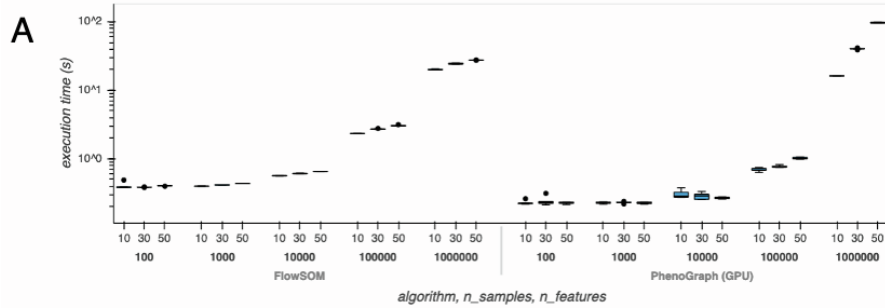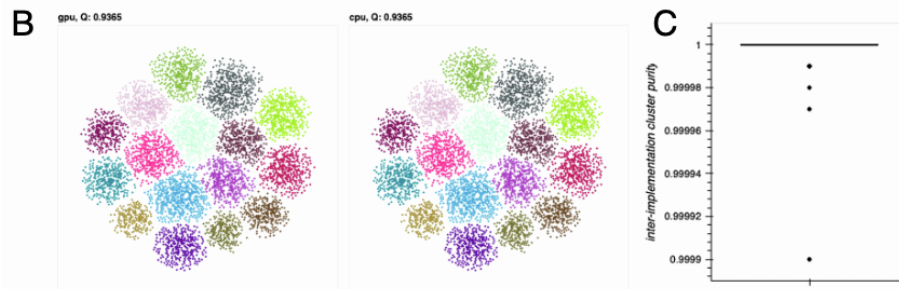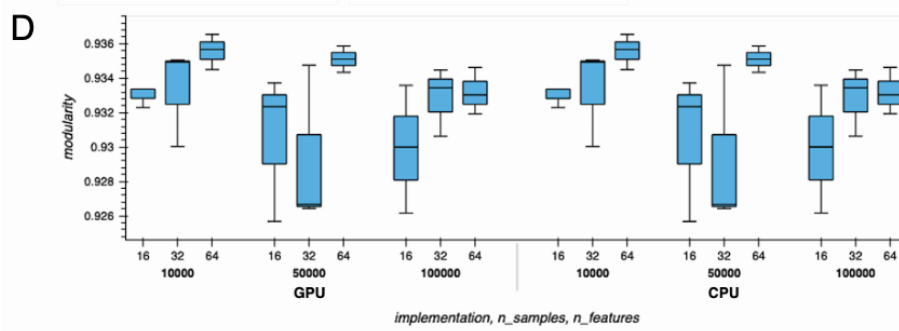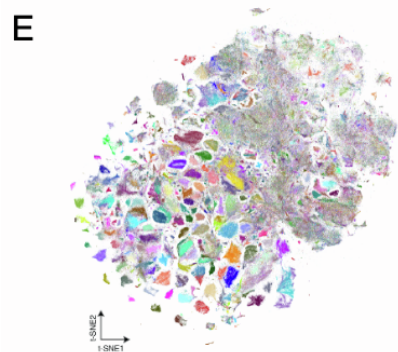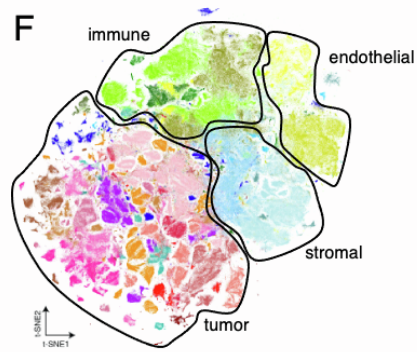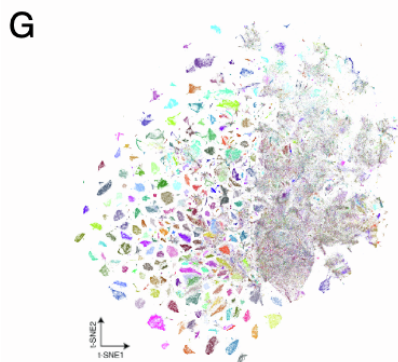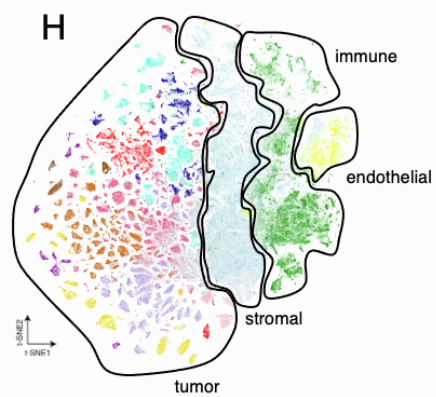

**Figure S3. Benchmarking single-cell phenotyping algorithms and implementations. Related to Figure 1, Figure 3, and STAR Methods.**

(A) Comparison of execution time between FlowSOM (Van Gassen et al., 2015) and our GPU implementation of PhenoGraph. Each boxplot represents the results from 5 replicate experiments using the indicated parameters. Lines in boxes indicate the medians and whiskers indicate data within  $1.5 \times$  interquartile range of the upper and lower quartiles. Outliers are shown as distinct points. (B) Benchmarking CPU and GPU implementations of PhenoGraph reveals no appreciable difference in quantitative endpoints between implementations. Scatter plots showing *t*-SNE embeddings of synthetic data, colored based on cluster label defined by either implementation. The modularity Q for each clustering result is shown above the plot. (C) Boxplot showing the distribution of GPU vs. CPU cluster purity for synthetic data. The line in the box indicates the median and whiskers indicate data within  $1.5 \times$  interquartile range of the upper and lower quartiles. The boxplot is compressed since most of the measurements were exactly or very near 1. Outliers are shown as distinct points. (D) Boxplots showing the distribution of clustering modularities for either implementation for the same synthetic data generated using the indicated number of samples and number of features. Lines in boxes indicate the medians and whiskers indicate data within  $1.5 \times$  interquartile range of the upper and lower quartiles. Outliers are shown as distinct points. Each boxplot represents the results from 5 replicate experiments using the indicated parameters. No significant difference was observed in modularity between implementations (ANOVA,  $P=0.999$ ). (E) For both OHSU and Basel cohorts, tumor cells differ more between samples than immune, stromal, or endothelial cells. The same *t*-SNE embedding of the OHSU dataset from Figure 1B, but with cells colored based on the unique tissue core from which they are derived. (F) The same *t*-SNE embedding of the OHSU dataset from Figure 1B, but with annotations indicating immune, stromal, endothelial, and tumor phenotypic regions. (G) A *t*-SNE embedding of the Basel dataset (Jackson et al., 2020) derived using the same parameters as were used for the OHSU *t*-SNE embedding, with cells colored based on the unique tissue core from which they are derived. (H) The same *t*-SNE embedding as in (G), but with annotations indicating immune, stromal, endothelial, and tumor phenotypic regions.

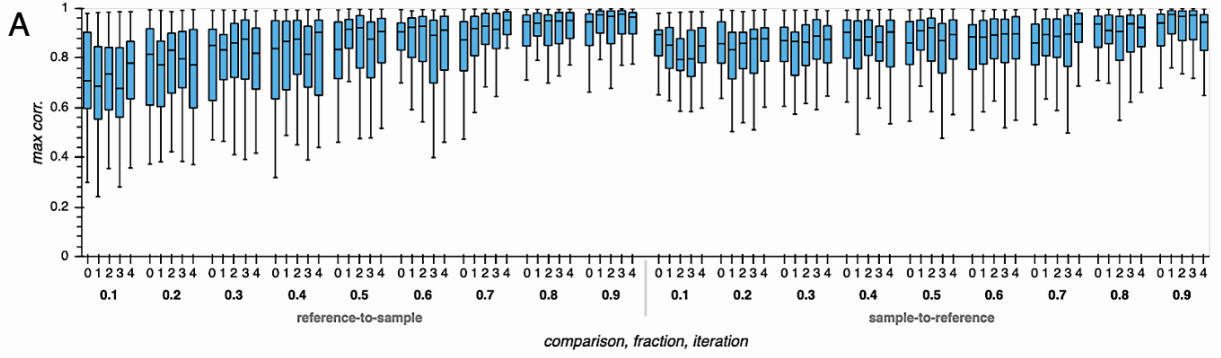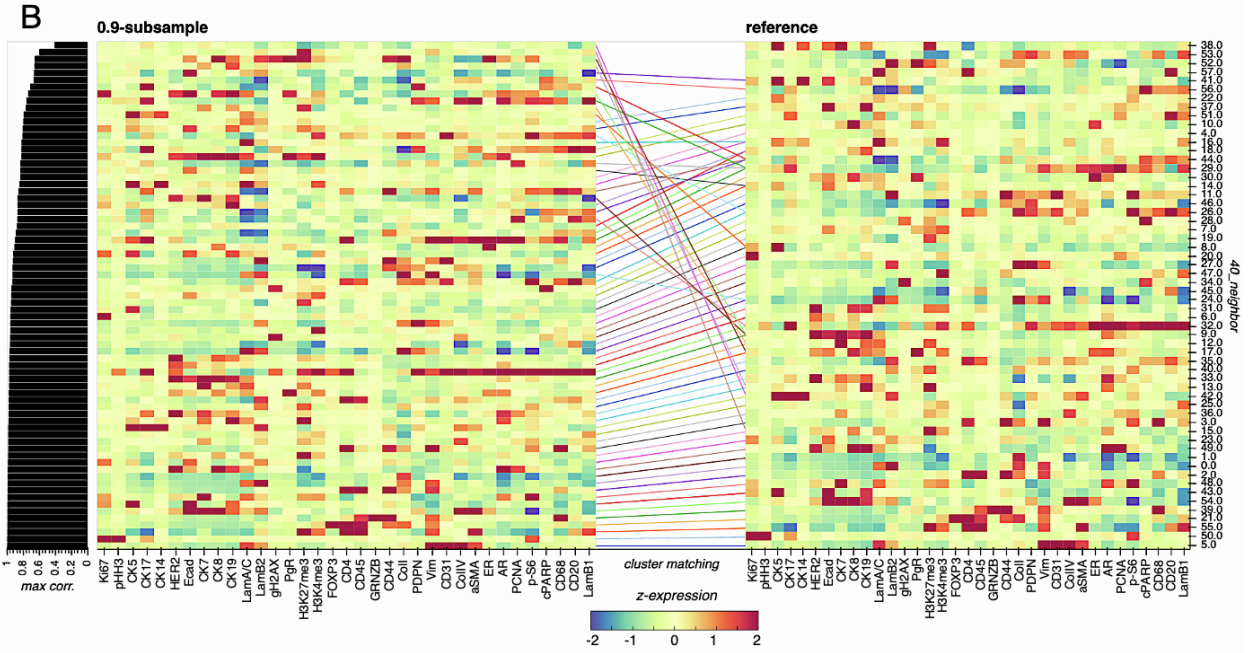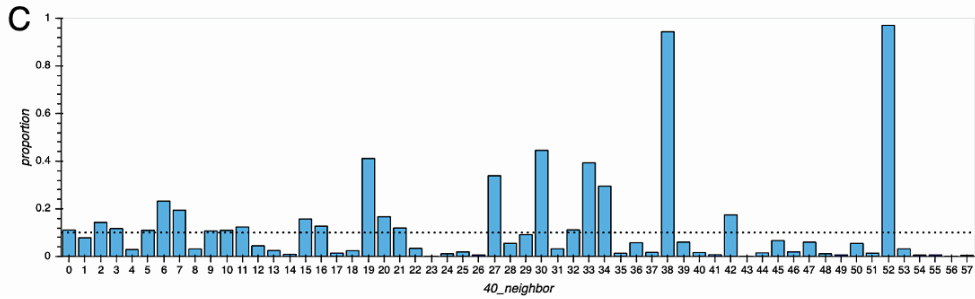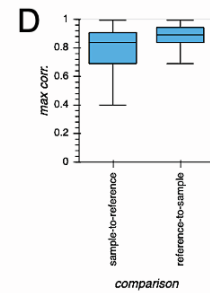



**Figure S4. BC cell phenotypes are robust against subsampling and noise. Related to Figure 1 and STAR Methods.**

(A) Maximum Pearson's correlations between full reference cell phenotypes and those derived using PhenoGraph on cells from a random fractional sample of TMA cores, iterated five times at each fraction level. Lines in boxes indicate the medians and whiskers indicate data within  $1.5 \times$  interquartile range of the upper and lower quartiles. (B) Phenotype matching between the full reference phenotypes and those derived from a 90%-subsampled fraction of TMA cores. Phenotypes are ordered by increasing matching correlation. Matching phenotypes are linked by a line, and lines are colored to discriminate between adjacent or overlapping links. 40\_neighbor represents the PhenoGraph cluster labels since we set  $k=40$  when defining the  $k$ -nearest neighbor graph in the PhenoGraph routine. The colorbar indicates z-scored marker expression. (C) The proportion of cells from each reference phenotype that correspond to the 10% of TMA cores held out from the 90%-subsampled fraction from (B). Unmatched phenotypes in the full reference correspond in part to cells from held-out cores. The dotted line marks the 10% threshold. (D) Maximum Pearson's correlation between full reference phenotypes and those derived using PhenoGraph on normalized mean intensities from all TMA cores, but with  $\pm 20\%$  random noise added to each marker in each core. Lines in boxes indicate the medians and whiskers indicate data within  $1.5 \times$  interquartile range of the upper and lower quartiles.

| Reference       | ME markers   |              |            |              |              |              |
|-----------------|--------------|--------------|------------|--------------|--------------|--------------|
| AR_Nuclei       | CK5_Ring     | FOXP3_Nuclei | CollV_Ring |              |              |              |
| aSMA_Ring       | CK14_Ring    | CD45_Ring    | CK7_Ring   | CK5_Ring     | CK19_Ring    |              |
| CD20_Ring       | CK14_Ring    | CK7_Ring     | CK5_Ring   | CK19_Ring    |              |              |
| CD31_Ring       | CK5_Ring     | CK19_Ring    | CK14_Ring  | CK7_Ring     | Ecad_Ring    |              |
| CD4_Ring        | CK19_Ring    | CK7_Ring     | CK14_Ring  | CK5_Ring     | Ecad_Ring    |              |
| CD44_Ring       | CK14_Ring    | CK7_Ring     | CK5_Ring   | CK19_Ring    | CD31_Ring    |              |
| CD45_Ring       | CK19_Ring    | CK7_Ring     | CK14_Ring  | CK5_Ring     | CK8_Ring     | CD31_Ring    |
| CD68_Ring       | CK19_Ring    | CK7_Ring     | CD31_Ring  | CK14_Ring    |              |              |
| CK14_Ring       | CD31_Ring    | CD68_Ring    | Vim_Ring   | aSMA_Ring    | CD20_Ring    | CD45_Ring    |
| CK17_Ring       | CD31_Ring    | CD68_Ring    | Vim_Ring   | Coll_Ring    | CD45_Ring    |              |
| CK5_Ring        | CD31_Ring    | CD68_Ring    | Vim_Ring   | CD4_Ring     | CD45_Ring    |              |
| CK19_Ring       | CD68_Ring    | CD4_Ring     | CD31_Ring  | CD45_Ring    |              |              |
| CK7_Ring        | CD68_Ring    | CD4_Ring     | CD31_Ring  | CD45_Ring    | FOXP3_Nuclei |              |
| CK8_Ring        | CD68_Ring    | CD4_Ring     | CD31_Ring  | CD45_Ring    |              |              |
| Coll_Ring       | CD45_Ring    | CK19_Ring    | CK7_Ring   | CK14_Ring    | CK5_Ring     |              |
| CollV_Ring      | CK19_Ring    | CK7_Ring     | CK14_Ring  | CK5_Ring     | CD68_Ring    | FOXP3_Nuclei |
| cPARP_Nuclei    | Ki67_Nuclei  | CK5_Ring     | CD31_Ring  | CD68_Ring    | CK14_Ring    |              |
| Ecad_Ring       | CD68_Ring    | CD4_Ring     | CD31_Ring  |              |              |              |
| ER_Nuclei       | CD68_Ring    | CD4_Ring     | CD31_Ring  | FOXP3_Nuclei |              |              |
| FOXP3_Nuclei    | CK19_Ring    | CK7_Ring     | CK5_Ring   | CK14_Ring    | CD31_Ring    | CK8_Ring     |
| gH2AX_Nuclei    | CK8_Ring     | CK14_Ring    | CK5_Ring   | CK7_Ring     |              |              |
| GRNZB_Ring      | CK19_Ring    | CK7_Ring     | CK5_Ring   | CD31_Ring    | CK14_Ring    | aSMA_Ring    |
| H3K27me3_Nuclei | CD31_Ring    | CD68_Ring    | CD44_Ring  |              |              |              |
| H3K4me3_Nuclei  | CD31_Ring    | CD68_Ring    | CD44_Ring  | CK19_Ring    |              |              |
| HER2_Ring       | CD68_Ring    | CD44_Ring    | CD31_Ring  | Vim_Ring     | CD4_Ring     |              |
| Ki67_Nuclei     | cPARP_Nuclei |              |            |              |              |              |
| LamA/C_Nuclei   | CD68_Ring    | CD44_Ring    | CK19_Ring  | CD45_Ring    |              |              |
| LamB1_Nuclei    | CD68_Ring    | CD44_Ring    | CK19_Ring  | CD45_Ring    | CK14_Ring    | CK7_Ring     |
| LamB2_Nuclei    | CD68_Ring    | CD44_Ring    | CK19_Ring  | CD31_Ring    | CK7_Ring     | CK14_Ring    |
| PCNA_Nuclei     | CK7_Ring     | CD45_Ring    | CD31_Ring  | CD68_Ring    | CK14_Ring    | LamB2_Nuclei |
| PDPN_Ring       | CK19_Ring    | CK7_Ring     | CK14_Ring  | CK5_Ring     | CD31_Ring    | CD68_Ring    |
| PgR_Nuclei      | CD68_Ring    | CD4_Ring     | CD31_Ring  | CD20_Ring    | aSMA_Ring    | Vim_Ring     |
| pHH3_Nuclei     | CD31_Ring    | CK5_Ring     | CK19_Ring  | CK14_Ring    | GRNZB_Ring   |              |
| p-S6_Ring       | CK19_Ring    | CK5_Ring     | CK7_Ring   | CK14_Ring    |              |              |
| Vim_Ring        | CK19_Ring    | CK7_Ring     | CD68_Ring  | CD45_Ring    | Ecad_Ring    |              |

**Table S1. Related to Figure 1 and Figure S2.** Putative reference and mutually-exclusive (ME) marker pairs used for RESTORE normalization of cell mean intensities. Each marker name indicates from which compartment its mean intensity was extracted. "Ring" indicates that a marker's intensity was extracted from the ring-shaped cytoplasmic segmentation masks derived by subtracting the "Nuclei" segmentation masks from "Cell" segmentation masks.
