# Supplementary material
Source: PubMed Central journal article supplement (PMC9017122)
Supplement: mmc2.pdf [file mmc2.pdf]

# Toward reproducible, scalable, and robust data analysis across multiplex tissue imaging platforms

## Graphical abstract

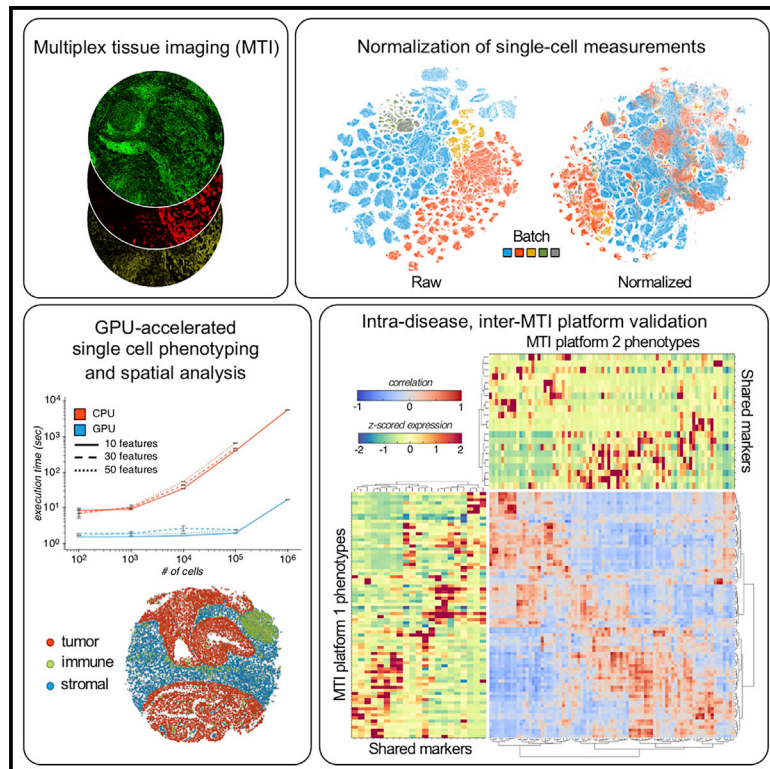

## Authors

Erik A. Burlingame, Jennifer Eng, Guillaume Thibault, Koei Chin, Joe W. Gray, Young Hwan Chang

## Correspondence

chanyo@ohsu.edu

## In brief

Burlingame et al. describe a GPU-accelerated workflow for normalization, phenotyping, and spatial analysis of single-cell multiplex tissue imaging (MTI) data. This workflow is deployed on breast cancer (BC) tissues to derive a cell type dictionary, which is validated between MTI platforms. Tissue architecture is used to discriminate between BC subtypes.

## Highlights

- Multiplex tissue imaging (MTI) data require a reliable analytical toolset
- GPU acceleration of single-cell analyses enables rapid iteration and interaction
- Inter-MTI platform validation of breast cancer (BC) cell types indicates consensus
- Spatial features of tissues discriminate between BC clinical subtypes

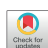

## Report

# Toward reproducible, scalable, and robust data analysis across multiplex tissue imaging platforms

Erik A. Burlingame,<sup>1,2</sup> Jennifer Eng,<sup>2</sup> Guillaume Thibault,<sup>2</sup> Koei Chin,<sup>2,3</sup> Joe W. Gray,<sup>2,3</sup> and Young Hwan Chang<sup>1,2,3,4,\*</sup><sup>1</sup>Computational Biology Program, Department of Biomedical Engineering, Oregon Health and Science University, Portland, OR 97239, USA<sup>2</sup>OHSU Center for Spatial Systems Biomedicine, Department of Biomedical Engineering, Oregon Health and Science University, Portland, OR 97239, USA<sup>3</sup>Knight Cancer Institute, Oregon Health and Science University, Portland, OR 97239, USA<sup>4</sup>Lead contact\*Correspondence: [chanyo@ohsu.edu](mailto:chanyo@ohsu.edu)<https://doi.org/10.1016/j.crmeth.2021.100053>

**MOTIVATION** Multiplex tissue imaging (MTI) is transforming biology by linking biomarker expression with spatial context. As the number of MTI platforms and spatial tissue atlases increases, so too must the capacity of our methods to ingest and derive insight from these data. Many of the methods used in MTI analysis are crossovers from other domains like flow cytometry and single-cell genomics, do not scale well, and might be statistically unfit for atlas-level MTI data, constituting a crucial bottleneck in the search for the next generation of clinically relevant biomarkers. Here, we address this bottleneck with a computationally efficient and platform-agnostic MTI data analysis workflow and its proof-of-concept application to human breast cancer (BC) tissues.

## SUMMARY

The emergence of megascale single-cell multiplex tissue imaging (MTI) datasets necessitates reproducible, scalable, and robust tools for cell phenotyping and spatial analysis. We developed open-source, graphics processing unit (GPU)-accelerated tools for intensity normalization, phenotyping, and microenvironment characterization. We deploy the toolkit on a human breast cancer (BC) tissue microarray stained by cyclic immunofluorescence and present the first cross-validation of breast cancer cell phenotypes derived by using two different MTI platforms. Finally, we demonstrate an integrative phenotypic and spatial analysis revealing BC subtype-specific features.

## INTRODUCTION

MTI methods like cyclic immunofluorescence (CyCIF) (Lin et al., 2018; Eng et al., 2020), CO-Detection by indEXing (CODEX) (Goltsev et al., 2018), multiplex immunohistochemistry (mIHC) (Tsujiikawa et al., 2017), imaging mass cytometry (IMC) (Giesen et al., 2014), and multiplex ion beam imaging (Angelo et al., 2014) enable measurements of the expression and spatial distribution of tens of markers in tissues, and have facilitated our understanding of the interactions and relationships among distinct cell types in diverse tissue microenvironments. Nevertheless, for MTI to reach its full potential as a research paradigm, numerous computational challenges must be overcome, including (1) reproducible normalization of single-cell intensity measurements to enable intra- and inter-sample comparisons; (2) robust cell phenotyping at megascale to enable comparison—and soon compilation—of MTI datasets from different platforms; and (3) the development of insightful spatial features to characterize the microenviron-

ment of the tissue or disease of interest, and so enable discrimination between tissues that vary over important clinical parameters.

The number of single-cell phenotyping algorithms has rapidly proliferated alongside the development of single-cell cytometry platforms (Weber and Robinson, 2016; Liu et al., 2019). With so many options from which to choose, the appropriate choice of algorithm depends on the questions one hopes to ask of the data being considered. For instance, prior biological knowledge can be leveraged by supervised or semi-supervised algorithms to bias identification toward known cell types of interest. In contrast, unsupervised algorithms identify cell types by leveraging only the internal data structure, making them the algorithms of choice in discovery-based studies where relatively little is known about the underlying biology. Among the unsupervised algorithms, PhenoGraph (Levine et al., 2015) and FlowSOM (Van Gassen et al., 2015) stand out for their abilities to precisely identify known cell types with high cluster coherence—i.e., high or low inter- or intra-cluster variance—and

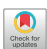

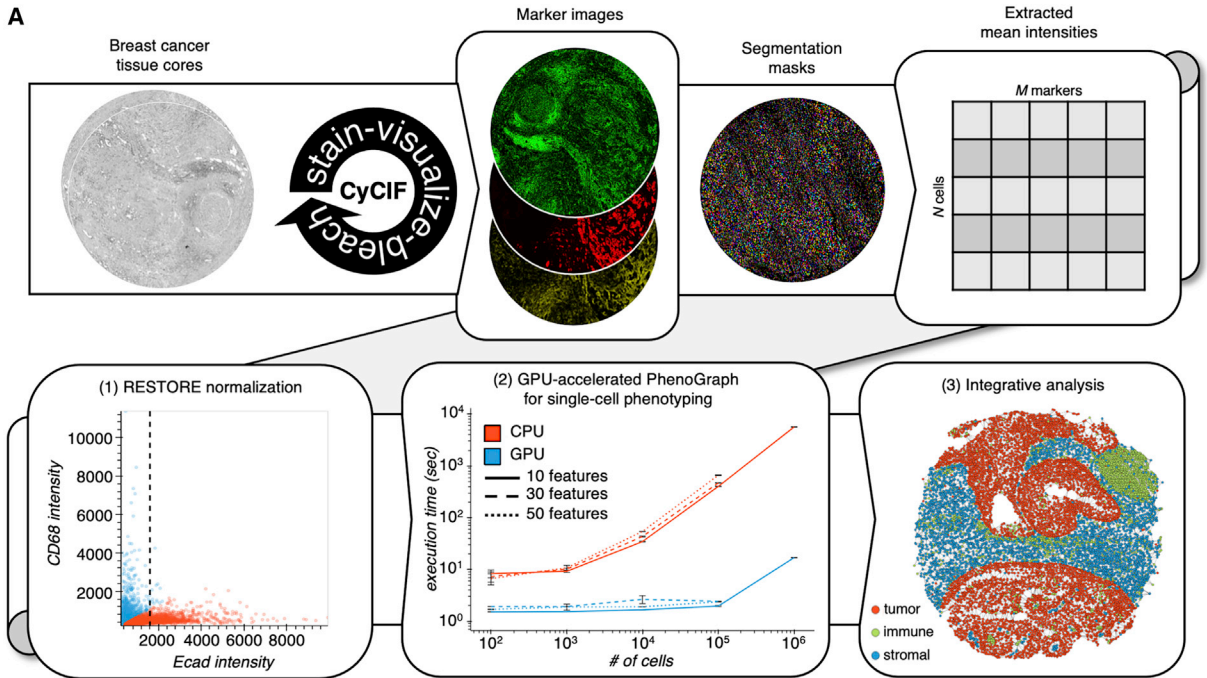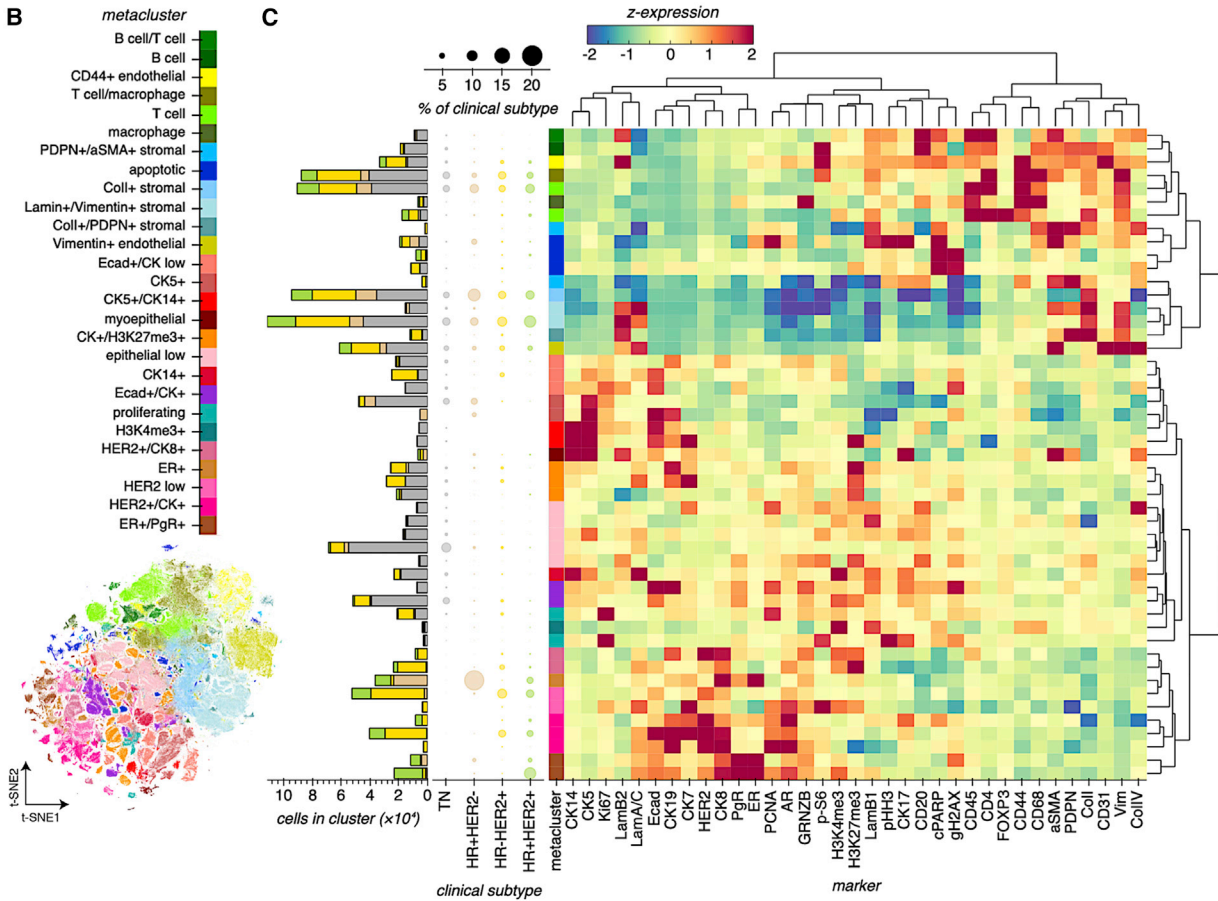

(legend on next page)

without the incorporation of prior biological knowledge (Liu et al., 2019). One notable tradeoff between these two CPU-executed algorithms is runtime: FlowSOM has a considerably faster runtime than PhenoGraph (Weber and Robinson, 2016). The relatively slow runtime of CPU-executed PhenoGraph motivated our GPU-accelerated implementation.

To address these challenges, we present (1) a broadened application of our data-intrinsic normalization method (Chang et al., 2020), which leverages the mutually exclusive expression pattern of marker pairs in MTI stain panels to estimate normalization factors without subjective and time-consuming manual gating; (2) a distributed and graphics processing unit (GPU)-accelerated implementation of PhenoGraph (Levine et al., 2015), the popular graph-based algorithm for subpopulation detection in high-dimensional single-cell data; and (3) an integrative analysis using this toolkit on ~1.3 million cells from a 180-sample, pan-subtype human BC tissue microarray (TMA) dataset (Figure S1) stained by CyCIF using a marker panel that characterizes tumor, immune, and stromal compartments (Figure 1A, STAR Methods). Through consideration of both tissue composition and architecture, we identify features independent from hormone receptor (HR) and human epidermal growth factor receptor 2 (HER2) expression that discriminate between the canonical BC subtypes.

## RESULTS

### GPU-accelerated BC cell type identification at megascale

For robust intensity normalization method for multiplexed imaging (RESTORE) normalization (Chang et al., 2020) of each TMA core, we leverage the fact that tumor, immune, and stromal cells exhibit mutually exclusive expression of cell-type-specific markers, and use a graph-based clustering to define positive and negative cells and normalization factors (Figure S2A, Table S1, see subsection “single-cell intensity normalization”). When the raw expression vectors of all cells across TMAs are embedded by t-stochastic neighbor embedding (t-SNE) (van der Maaten and Hinton, 2008), cells are segregated on the basis of TMA source (Figure S2B, left), mainly because of batch effect and in part because of subtype bias within TMAs (Figures S1B and S1C). After normalization, shared cell types between TMAs are co-embedded (Figure S2B, right) and cell expression of immune, tumor, and stromal markers is segregated (Figure S2C), a validation of the normalization process.

To define cell types among the ~1.3 million cells in the normalized feature table, we first attempted to use the central processing unit (CPU)-based version of the widely used algorithm PhenoGraph (Levine et al., 2015), but found it to be inefficient at this scale. To overcome this computational bottleneck, we re-implemented PhenoGraph to be executable on GPUs. Using the Python libraries RAPIDS (Raschka et al., 2020) and CuPy (Okuta et al., 2017) to parallelize and accelerate several of PhenoGraph’s computations (see subsection “single-cell phenotyping algorithm selection”), we observed multiple orders of magnitude improvement in the algorithm’s speed without sacrificing clustering quality (Figure 1A, box 2). Our GPU implementation of PhenoGraph is competitive with FlowSOM in terms of execution time (Figure S3A), which until now was one of the primary motivations for choosing FlowSOM over PhenoGraph (Weber and Robinson, 2016; Liu et al., 2019). Moreover, to ensure that our GPU implementation of PhenoGraph produced results consistent with the CPU implementation, we benchmarked each by using synthetic datasets and detected no significant difference between CPU and GPU clustering modularity (Figures S3B–S3D).

Our PhenoGraph implementation identified diverse tumor, immune, and stromal cell types across tissues and BC subtypes (Figures 1B and 1C). To define phenotypes shared across tissues, metaclusters of similar phenotypes were aggregated on the basis of the hierarchical clustering of phenotypes based on their mean marker expression. Although tissues from all BC subtypes contained similar populations of immune, stromal, and endothelial cells, differences between BC subtypes were largely driven by variable tumor cells expression of luminal and basal cytokeratins, HER2, and the HRs estrogen receptor (ER) and PgR, as previously reported (Jackson et al., 2020).

### Identified cell phenotypes are robust against noise and subsampling

To assess PhenoGraph clustering robustness to sampling shift, PhenoGraph clusters were derived by using random subsets of tissues of varying cardinality, from 10% to 90% of all tissues, and compared the Z-scored mean marker intensities of the PhenoGraph-derived clusters from the full reference dataset and each subset by using pairwise Pearson’s correlation. Even with heavy subsampling, the median of the maximum correlations between matching clusters from reference-to-sample comparisons held at ~0.75 (Figure S4A), indicating that we are defining a robust core set of cell phenotypes. Indeed, the major variation between reference and subsample clusters appeared to be sample-specific tumor cell phenotypes from the tissues held out from

### Figure 1. GPU-accelerated analysis of single-cell phenotypes across BC clinical subtypes

(A) Overview of CyCIF analysis workflow. Once TMA cores are stained by CyCIF, cells are segmented and cell mean intensities are extracted, normalized, then used to define cell phenotypes for analyses of tissue composition and architecture. Box 1 shows an example of RESTORE normalization (Chang et al., 2020) of single-cell Ecad intensities when using mutually exclusive expression of CD68 to derive a normalization factor for Ecad. See Figure S2 for additional normalization details. Box 2 shows benchmarking results for CPU and GPU implementations of PhenoGraph for phenotyping of simulated single-cell datasets. Compared with the legacy CPU implementation, our GPU implementation of PhenoGraph is orders of magnitude faster at scale. Points and error bars show the mean and standard deviation of three replicate executions, respectively. See also Figure S3. Box 3 shows the spatial layout of high-dimensional cell phenotypes in a representative tissue core.

(B) t-SNE embedding of full single-cell CyCIF dataset colored by cell phenotype metacluster. See also Figure S3.

(C) Hierarchical clustering of PhenoGraph clusters and CyCIF markers. The color scale represents the Z-scored marker expression. The scatterplot displays how each BC subtype is composed, where point size represents the percentage of that BC subtype that is composed of that cluster. The bar plot represents that absolute number of cells belonging to each cluster and BC subtype. See also Figure S4.



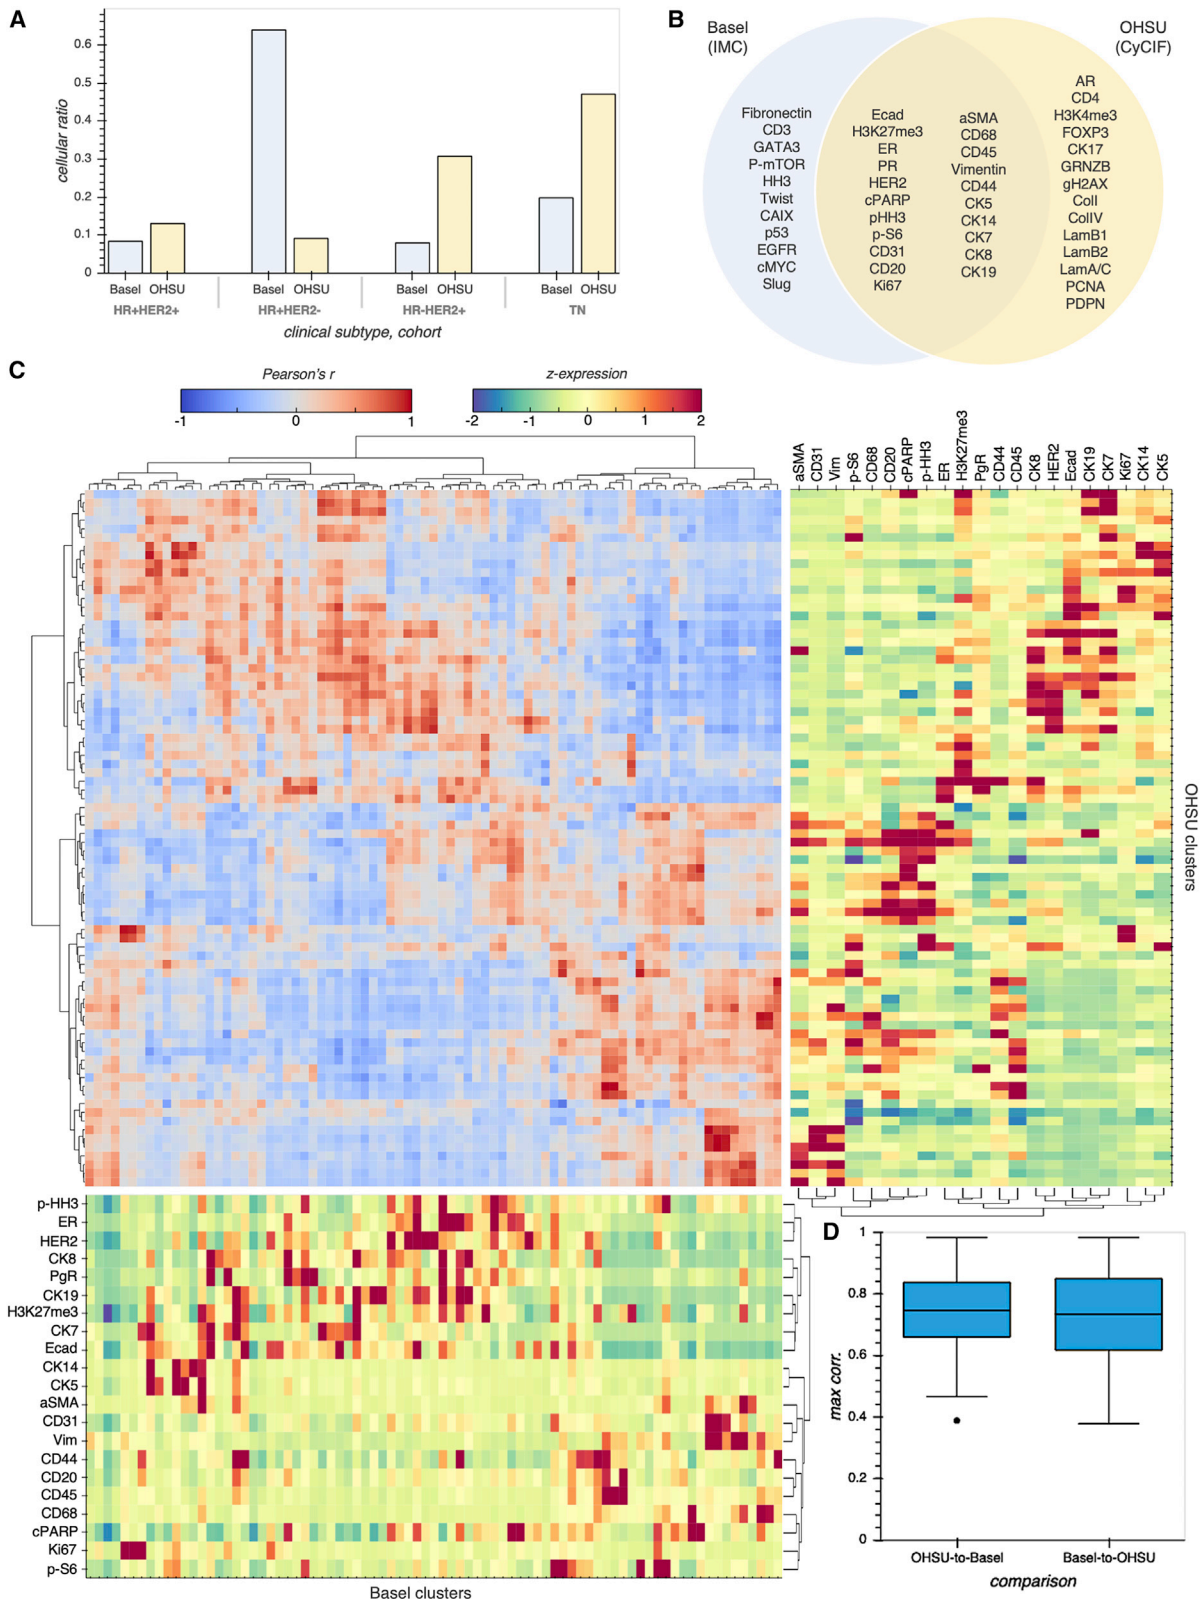

(legend on next page)

each subsample (Figures S4B and S4C), suggesting that PhenoGraph defines robust cell phenotypes that are shared across tissues and is capable of detecting new phenotypes as they are added to the dataset.

We further assessed the robustness of our identified cell phenotypes by applying  $\pm 20\%$  noise to normalization factors for each marker for each core (Figure S4D) and found that phenotypes are identified as they are sampled and are robust to minor variation in normalization factors. We simulated  $\pm 20\%$  measurement noise by multiplying the normalized cell intensity vectors for each tissue and marker by a scaling factor drawn uniformly at random from the range [0.8,1.2] and compared the Z-scored mean marker intensities of the PhenoGraph-derived clusters from the clean reference and noisy datasets by using pairwise Pearson's correlation. Even with these significant perturbations to the intensity profiles of cells, the median of the maximum correlations between matching clean and noisy clusters held above 0.8 (Figure S4D), indicating cluster robustness to differentials in preanalytical variables like tissue fixation or autofluorescence which can affect measured IF intensity across a TMA.

We acknowledge that segmentation is a critical pre-processing step that can affect downstream analyses. Instead of comparing various segmentation methods and downstream analysis results, we demonstrated robustness of cell types with  $\pm 20\%$  random noise added to each marker in each core alternatively. This variation implicitly reflects the mean intensity variation of each marker expected using different segmentation methods.

### Inter-MTI platform benchmarking of cell phenotypes suggests basis for inter-MTI platform data integration

With the growth of MTI in the cancer research and translational communities, there is an acute need for robust and integrative analyses of MTI data across platforms and cohorts (Rozenblatt-Rosen et al., 2020). In a step toward addressing that need, we validated our identified cell types through comparison with a recently published survey of BC by IMC (Jackson et al., 2020). Although the total number of cells from each BC subtype varied between the Basel (IMC) and Oregon Health and Science University (OHSU) (CyCIF) cohorts (Figure 2A), there was substantial overlap between the marker panels used for each MTI platform (Figure 2B). By aligning the cell phenotypes independently detected by PhenoGraph in each cohort (Figure 2C), we found highly correlated clusters for stromal, immune, basal, and proliferating cell types, among others (Figure 2D), suggesting that shared cell types could be matched across cohorts and MTI platforms, a necessary step for data integration. We note that differences between cohort cell types might reflect the differences between cohort composition with respect to

BC subtype. Consistent between cohorts and platforms, tumor cells differed more between samples than did immune, stromal, and endothelial cells (Figures S3E–S3H).

### Integrative analysis reveals BC subtype-specific features of tissue composition and architecture

Although BC is appreciated as a genetically and morphologically heterogeneous disease, its clinical subtyping is based on the expression of relatively few markers, in particular, tumor cell expression of the hormone receptors for estrogen and progesterone (ER and PgR, respectively, or HR, collectively), and human epidermal growth factor 2 (HER2), which is insufficient to explain differences in treatment response within each subtype (Prat et al., 2015). Recent studies using MTI to interrogate intact BC tissues have found that the spatial contexture of the BC microenvironment can improve our ability to predict clinical outcome (Jackson et al., 2020; Keren et al., 2018). However, because these studies have focused on either disease risk or a single BC clinical subtype, here we focused on compositional and spatial features that differentiate between subtypes.

At the composition level, we first considered the tumor cell differentiation states of BC subtypes through their expression of luminal and basal cytokeratins (CKs). Although CK<sup>+</sup> cells in HR<sup>-</sup>/HER2<sup>+</sup>, HR<sup>+</sup>/HER2<sup>-</sup>, and HR<sup>+</sup>/HER2<sup>+</sup> tissues primarily expressed luminal CKs 19, 8, and 7, CK<sup>+</sup> cells in triple negative (TN) tissues exhibited significantly greater differentiation state heterogeneity (Figure 3A), as they expressed many different combinations of luminal and basal cytokeratins (Figure 3B). This differentiation state heterogeneity is consistent with the genetic and histological heterogeneity of triple-negative BC (TNBC) described in other studies (Haupt et al., 2010; Bianchini et al., 2016). We next determined the composition of each tissue core with respect to the cell metaclusters we defined above. Hierarchical clustering of cores on the basis of their cell metacluster densities highlighted the broad variability of cellular composition within and between BC subtypes (Figures 3C and 3D). When the cell metaclusters were further aggregated into immune, stromal, and tumor cell types (see subsection "aggregation of immune, stromal, and tumor cell phenotypes"), we found the HR<sup>+</sup>HER2<sup>-</sup> tissues to have lower overall immune cell density than the other BC subtypes, and no differences in stromal or tumor cell density between subtypes (Figure 3E).

Recognizing that cell density measurements fail to capture the organization of cells in each tissue, we next characterized the spatial architectures of BC subtypes by building cell neighborhood graphs for each tissue. Given the recent evidence that the quantity and diversity of BC tumor cell interactions with other cell types can inform disease outcome (Jackson et al., 2020; Keren et al., 2018),

### Figure 2. Cross-validation of BC cell phenotypes between MTI platforms reveals commonalities between two BC cohorts

- (A) Cellular ratio highlighting compositional differences between Basel (Jackson et al., 2020) and OHSU (this work) cohorts with respect to BC subtype.  
 (B) The intersection of the IMC and CyCIF marker panels used to stain tissues from the Basel and OHSU cohorts, respectively.  
 (C) PhenoGraph cluster matching between Basel and OHSU cohorts. Using only the intersecting markers, we independently clustered cells from each cohort by using PhenoGraph with the same parameterization, then cohort clusters were pairwise correlated and hierarchically clustered on the basis of the resulting correlation structure. We identified highly correlated clusters between cohorts, including those corresponding to epithelial, immune, stromal, endothelial, and proliferating cell populations.  
 (D) Maximum Pearson's correlation corresponding to inter-cohort cluster matches. Lines in boxes indicate the medians, and whiskers indicate data within 1.5 $\times$  interquartile range of the upper and lower quartiles. Outliers are shown as distinct points.

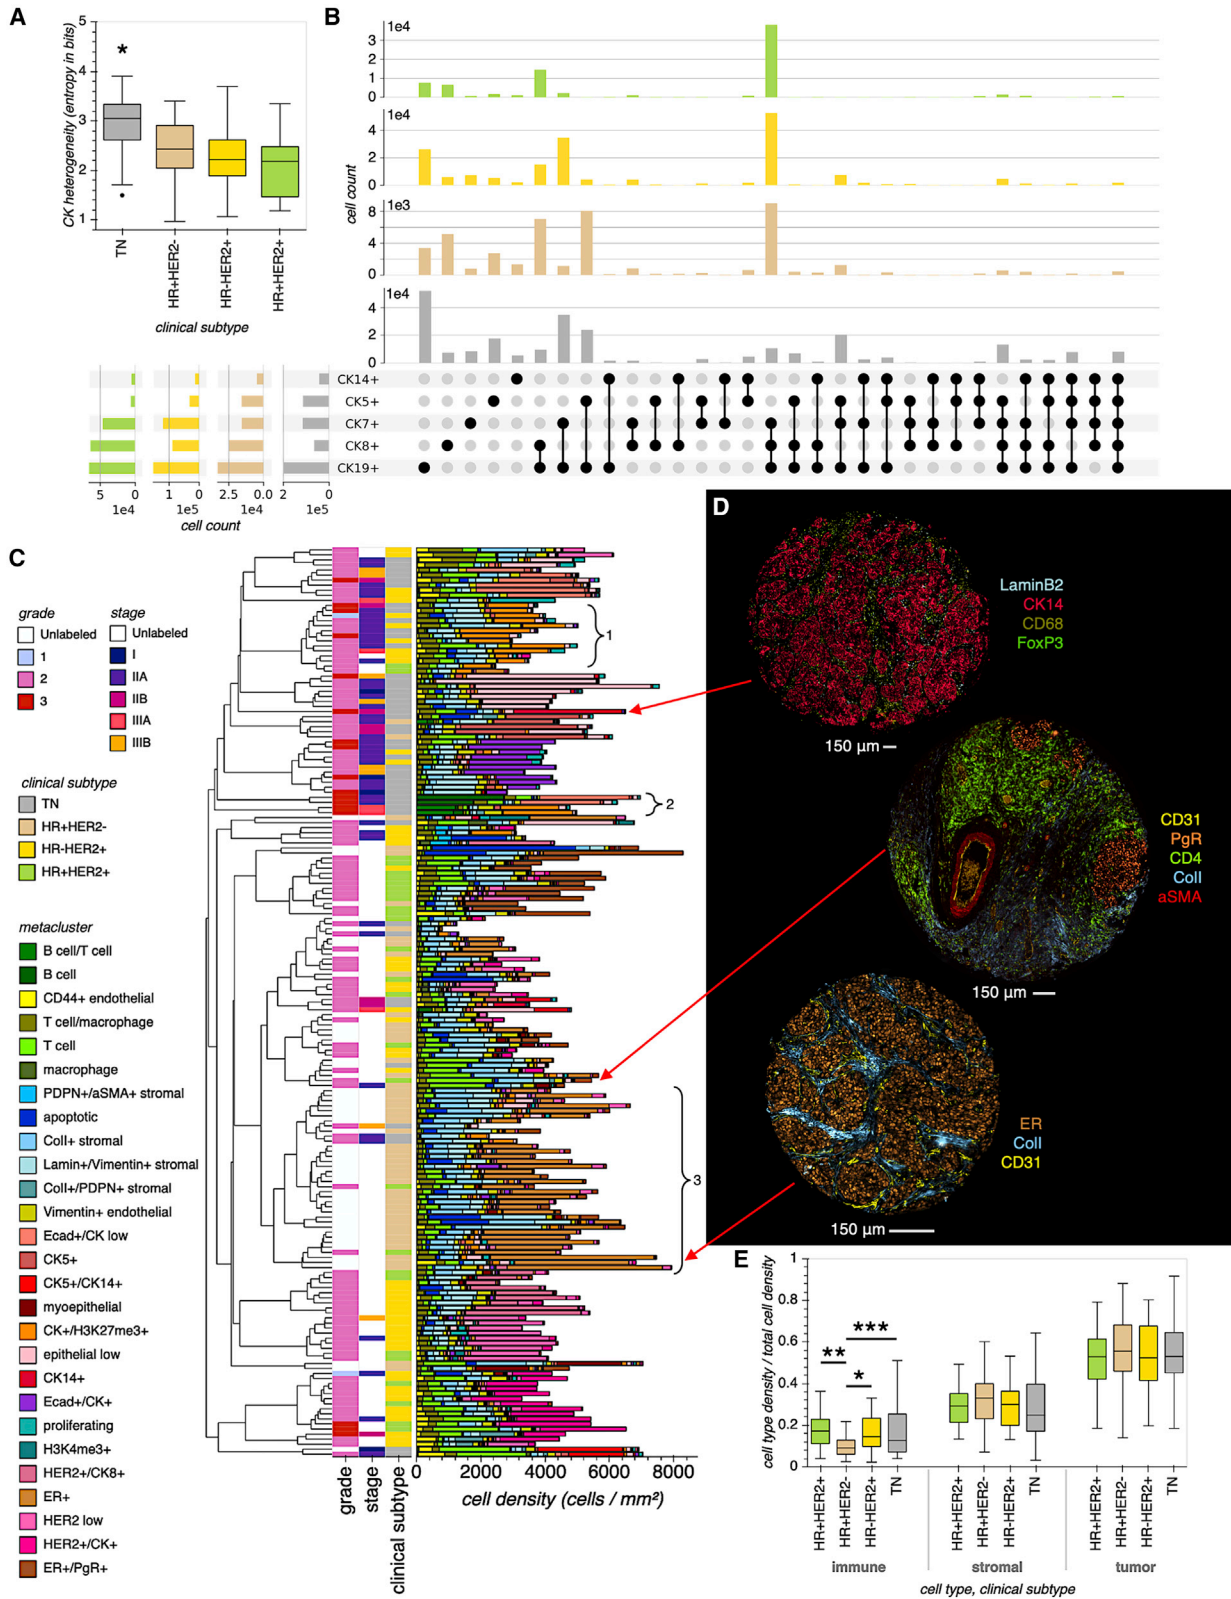

(legend on next page)



we first identified the neighboring cells to each tumor cell and compared the composition of tumor cell neighborhoods across BC subtypes (Figure 4A). Although most tumor cell interactions (~70%–80%) are with other tumor cells typical of their BC subtype, we observed increased tumor-stromal interaction in the HR<sup>+</sup>HER2<sup>-</sup> subtype. When considering tissues that contain an appreciable population of stromal cells (tissues comprising at least 25% stromal cells), we confirmed that there was significantly more stromal mixing with tumor cells in HR<sup>+</sup>HER2<sup>-</sup> tissues (Figure 4B). Importantly, stromal mixing can vary widely between tissues in spite of their similar stromal densities (Figure 4C), highlighting the importance of the spatial context that is preserved in intact tissues. Given that malignant epithelial cells can suppress fibroblast maturation and thus promote fibroblast aromatase activity (Bulun et al., 2012), ER<sup>+</sup>HER2<sup>-</sup> tumors likely favor more proximal fibroblasts as a source of growth-inducing estrogen than other BC subtypes, and might even act to maintain tumor microenvironments with high stromal mixing (Brechtbuhl et al., 2017).

We reasoned that differences in tumor-stromal interaction might translate into detectable differences between BC subtypes based on their tumor architectures alone. To characterize the tumor architecture of each tissue, we constructed tumor architecture graphs over which we computed the closeness centrality for each tumor cell, which quantifies the relative closeness of that tumor cell to all other tumor cells in the tissue (Figure 4D). Consistent with the stromal mixing trend observed above, HR<sup>+</sup>HER2<sup>-</sup> tissues had a mean tumor closeness centrality significantly greater than tissues from the other BC subtypes (Figures 4E and 4F), which is in part a reflection of HR<sup>+</sup>HER2<sup>-</sup> tumor cell nests tending to be separated by narrower streams of stromal cells than tumor nests in tissues from other BC subtypes (Figure 4C). In summary, by analyzing BC tissues with spatially resolved MTI, we have identified inter-cell phenotype (stromal mixing) and intra-cell phenotype (tumor closeness centrality) interactions that can be leveraged to help discriminate between canonical BC subtypes on a basis other than receptor expression.

## DISCUSSION

This work is motivated by an understanding that the spatial context of the tumor microenvironment in intact cancer tissues

enables a more granular definition of disease, and we hope for the design of more personalized and effective treatments. With spatially resolved MTI, our analysis makes clear that the cellular composition of BC tissue can belie important aspects of its spatial architecture. Ongoing work involves validating these findings in a cohort with more extensive clinical annotation to assess their significance to disease outcome between and within BC subtypes. Although the BC cell phenotypes and architectural features we have derived will be assets to future BC studies, our generic toolkit can be used alone or integrated with existing toolkits (Schapiro et al., 2017) to improve the efficiency and reproducibility of analytics for any single-cell measurement platform.

Although we demonstrated the computational efficiency of GPU-implemented PhenoGraph, graph-based clustering methods and other extensions could benefit from our implementation, and the CPU-to-GPU software translation approach, in general. For instance, some components of PhenoGraph (e.g., constructing a *k*-nearest neighbor graph) are also implemented as part of Seurat (Butler et al., 2018), a popular tool for single-cell RNA sequencing analysis. Thus, our approach could help extended applications like Seurat scale up for the megascale and greater meta-analyses of the near future.

## Limitations of the study

In this study, we limit our scope to the identification of a robust BC cell phenotype dictionary and its validation against a BC cell phenotype dictionary defined by using another MTI platform. As such, we focus on methodological details, validation, and demonstration of reproducible, scalable, and robust data analysis. Although the clinical metadata for the described data were highly fragmented and limited the application scope of the study, we envision that the identified BC cell phenotypes we derive and robustly cross-validate here will be useful to future MTI-based studies that have more comprehensive clinical metadata at their disposal.

Although we acknowledge that segmentation is a critical pre-processing step that can affect downstream analyses, we feel that that a broad comparison against state-of-the-art segmentation methods is beyond the scope of the current study.

### Figure 3. BC subtypes are differentiated by single-cell composition

(A) Epithelial differentiation heterogeneity across BC subtypes. Box plot displaying CK expression heterogeneity across BC subtypes, where each box represents the distribution of tissue cores from a BC subtype, and each core is summarized on the basis of the entropy of the distribution of CK<sup>+</sup> cell types contained within it. Lines in boxes indicate the medians, and whiskers indicate data within 1.5× interquartile range of the upper and lower quartiles. Outliers are shown as distinct points. Groupwise comparisons were made by using one-way ANOVA with pairwise Tukey post-hoc test (TN, *n* = 47; HR<sup>+</sup>HER2<sup>-</sup>, *n* = 52; HR<sup>-</sup>HER2<sup>+</sup>, *n* = 53; HR<sup>+</sup>HER2<sup>+</sup>, *n* = 28). \**p* < 0.001 for all TN comparisons with other BC subtypes.

(B) UpSet plot summarizing the distribution of CK<sup>+</sup> cell types across BC subtypes, considering each CK alone (left margin) or in combination (upper margin).

(C) Cell phenotype density across tissue cores. Bar plot where each bar represents a TMA core, the full bar height represents its total cell density, and each colored segment represents the density of a particular cell metacluster. Bars are hierarchically clustered on the basis of cell metacluster densities. Each bar is labeled with its corresponding subtype, stage, and grade, if a label is available. The inset brackets indicate (1) cores with abundant H3K27me3+ tumor cells, which could indicate a mechanism of HR repression in some TN and HR<sup>-</sup>/HER2<sup>+</sup> tissues (Chen et al., 2016); (2) cores with abundant infiltrating B cells (TIL-B), consistent with association found between TIL-B and high-grade, HR<sup>-</sup> BC (Garaud et al., 2019); and (3) cores with relatively low immune density, consistent with the finding that HR<sup>+</sup>/HER<sup>-</sup> tissues are immunologically cold compared with TN and HER2+ tissues (Ali et al., 2015; Wimberly et al., 2015).

(D) A selection of representative tissue cores.

(E) The immune, stromal, and tumor densities of tissue cores from each BC subtype. Lines in boxes indicate the medians, and whiskers indicate data within 1.5× interquartile range of the upper and lower quartiles. Groupwise comparisons were made by using one-way Welch ANOVA and Games-Howell post-hoc test. \**p* < 0.034, \*\**p* < 0.035, \*\*\**p* < 0.079 (TN, *n* = 47; HR<sup>+</sup>HER2<sup>-</sup>, *n* = 52; HR<sup>-</sup>HER2<sup>+</sup>, *n* = 53; HR<sup>+</sup>HER2<sup>+</sup>, *n* = 28).



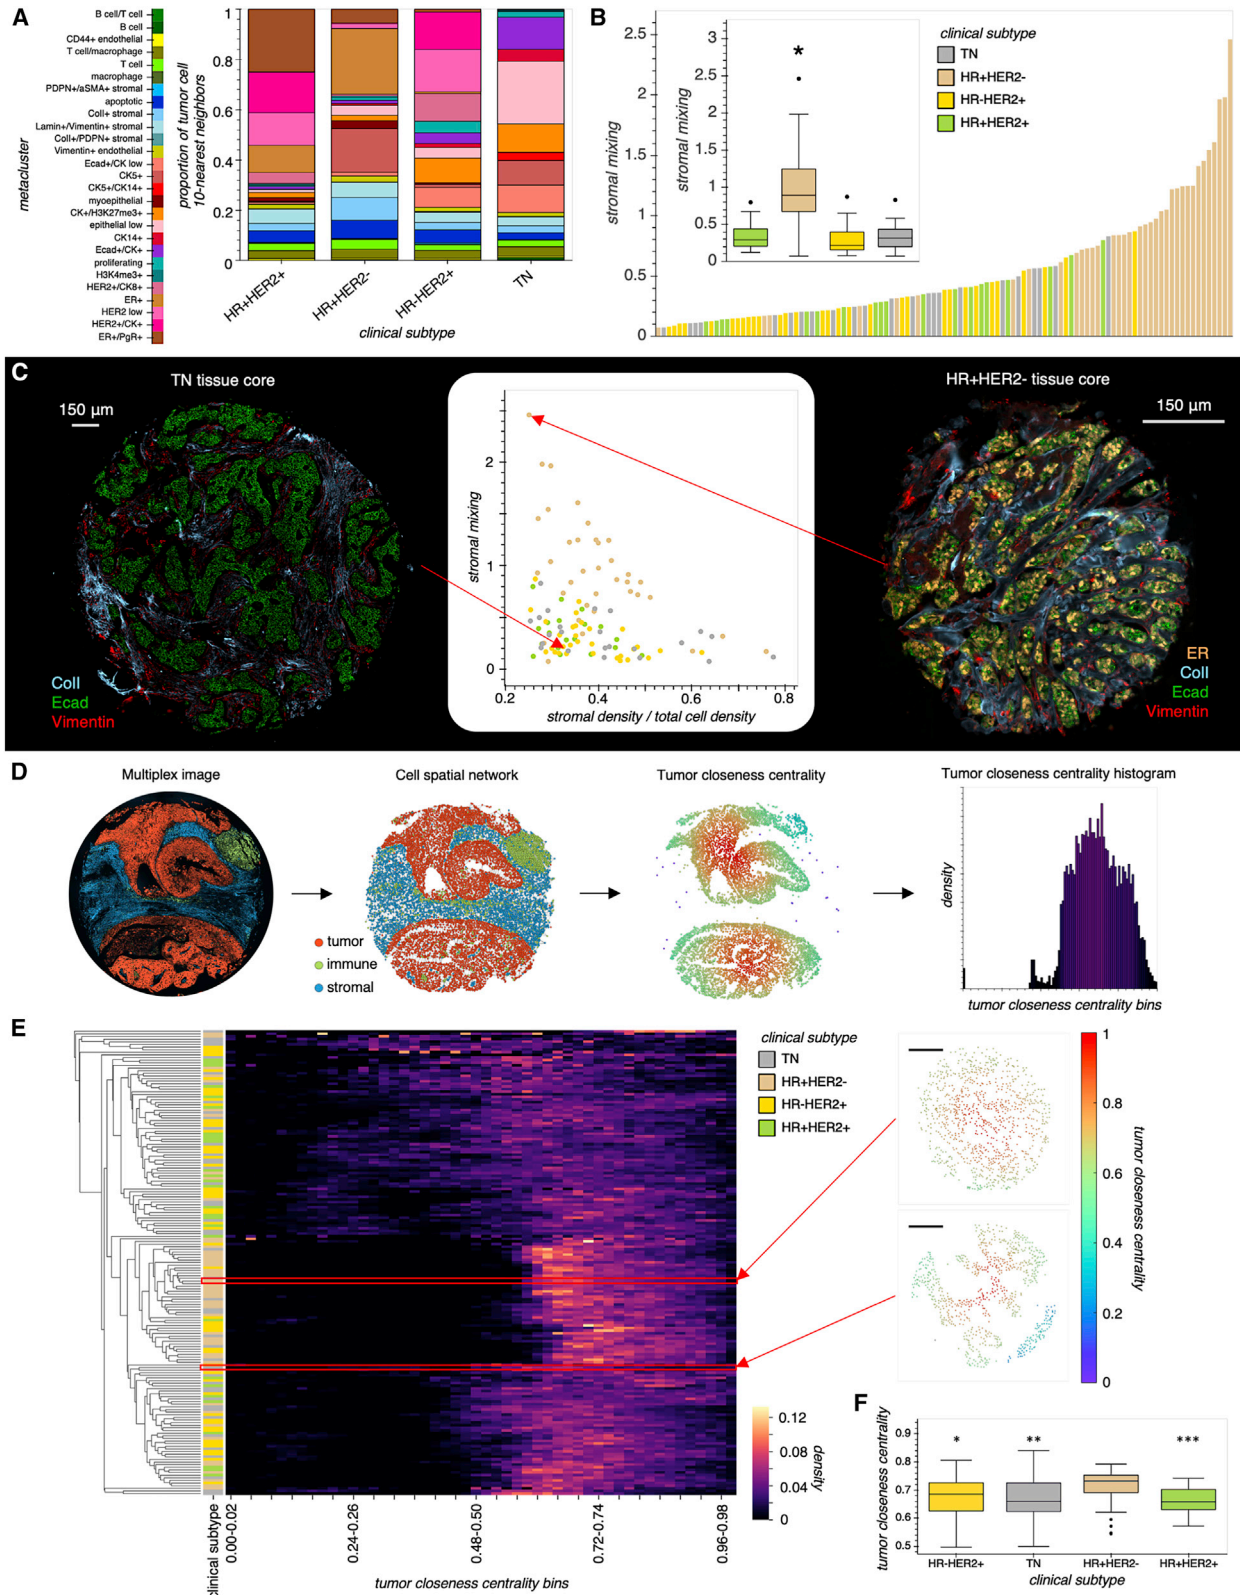

(legend on next page)

Alternatively, we demonstrated robustness of cell types with variation added to each marker in each core. This variation implicitly reflects the mean intensity variation of each marker expected when using different segmentation methods, indicating that the methods we propose here are also robust to differences in segmentation approach.

### STAR★METHODS

Detailed methods are provided in the online version of this paper and include the following:

- KEY RESOURCES TABLE
- RESOURCE AVAILABILITY
  - Lead contact
  - Materials availability
  - Data and code availability
- EXPERIMENTAL MODEL AND SUBJECT DETAILS
  - Acquisition of breast cancer tissue microarrays (TMAs)
- METHOD DETAILS
  - Preparation and cyclic immunofluorescence (CyCIF) staining of tissues
  - Fluorescence microscopy
  - Quenching fluorescence signal
  - Cell segmentation and mean intensity extraction
  - Single-cell intensity normalization
  - Single-cell phenotyping algorithm selection
  - GPU acceleration of PhenoGraph
  - Benchmarking CPU and GPU implementations of PhenoGraph
  - Single-cell phenotyping and metacluster annotation
  - t-stochastic neighbor embedding (t-SNE)
  - Cross-platform breast cancer cell phenotype validation
  - Epithelial differentiation heterogeneity
  - Aggregation of immune, stromal, and tumor cell phenotypes
  - Cell phenotype density
  - Tumor cell neighborhood interactions
  - Tumor graph centrality
  - Plotting and visualization

- Computing hardware
- QUANTIFICATION AND STATISTICAL ANALYSIS

### SUPPLEMENTAL INFORMATION

Supplemental information can be found online at <https://doi.org/10.1016/j.crmeth.2021.100053>.

### ACKNOWLEDGMENTS

This work was supported in part by the National Cancer Institute (U54CA209988, U2CCA233280, U01 CA224012, R01 CA253860), CRUK-OHSU joint funding award, the OHSU Center for Spatial Systems Biomedicine, and a Biomedical Innovation Program Award from the Oregon Clinical and Translational Research Institute. We acknowledge expert technical assistance by staff in the Advanced Multiscale Microscopy Shared Resource, supported by the OHSU Knight Cancer Institute (NIH P30 CA069533) and the Office of the Senior Vice President for Research. Equipment purchases included support by the OHSU Center for Spatial Systems Biomedicine, the MJ Murdock Charitable Trust, and the Collins Foundation. We also acknowledge Mitchell Dowsett for his contribution of TMAs used in this study. The resources of the Exacloud high-performance computing environment developed jointly by OHSU and Intel and the technical support of the OHSU Advanced Computing Center are gratefully acknowledged. E.A.B. receives support from a scholar award provided by the ARCS (Achievement Rewards for College Scientists) Foundation Oregon.

### AUTHOR CONTRIBUTIONS

Conceptualization, E.A.B., J.W.G., and Y.H.C.; methodology, E.A.B., J.E., G.T., K.C., J.W.G., and Y.H.C.; software, E.A.B., G.T., and Y.H.C.; validation, E.A.B., J.E., K.C., and Y.H.C.; formal analysis, E.A.B.; investigation, E.A.B. and J.E.; resources, K.C. and J.W.G.; data curation, E.A.B. and J.E.; writing – original draft, E.A.B. and Y.H.C.; Writing – review & editing, E.A.B., J.W.G., and Y.H.C.; visualization, E.A.B.; supervision, J.W.G. and Y.H.C.; project administration, J.W.G. and Y.H.C.; funding acquisition, E.A.B., Y.H.C., and J.W.G.

### DECLARATION OF INTERESTS

J.W.G. has licensed technologies to Abbott Diagnostics; has ownership positions in Convergent Genomics, Health Technology Innovations, Zorro Bio, and PDX Pharmaceuticals; serves as a paid consultant to New Leaf Ventures; has received research support from Thermo Fisher Scientific (formerly FEI), Zeiss, Miitenyi Biotech, Quantitative Imaging, Health Technology Innovations, and Micron Technologies; and owns stock in Abbott Diagnostics, AbbVie, Alphabet, Amazon, Amgen, Apple, General Electric, Gilead, Intel, Microsoft, Nvidia, and Zimmer Biomet.

### Figure 4. BC cellular composition belies tumor-stromal interaction and tumor architecture

- (A) Stacked bar plots displaying the proportion of tumor cell 10-nearest neighbors for each BC subtype. Each colored bar segment represents the proportion of tumor cell neighbors that are composed of the corresponding cell metacluster.
- (B) Bar plot representation of tissue core stromal mixing, where only cores with greater than 0.25 stromal fraction are shown. Cores are ordered on the basis of increasing stromal mixing. Inset shows box plot comparing stromal mixing over BC subtype. For inset, lines in boxes indicate the medians, and whiskers indicate data within 1.5× interquartile range of the upper and lower quartiles. Outliers are shown as distinct points. Groupwise comparisons were made by using one-way Welch ANOVA and Games-Howell post-hoc test. \*p < 0.001 for all HR<sup>+</sup>HER2<sup>-</sup> comparisons (TN, n = 47; HR<sup>+</sup>HER2<sup>-</sup>, n = 52; HR<sup>-</sup>HER2<sup>+</sup>, n = 53; HR<sup>+</sup>HER2<sup>+</sup>, n = 28).
- (C) Scatterplot displaying stromal density versus stromal mixing and images of representative cores with similar stromal density but different stromal mixing.
- (D) Overview of tumor architecture characterization. A spatial graph is defined over tumor cells, where each tumor cell is connected to others within a 65-μm radius from its centroid, and the closeness centrality is then measured over this graph. Each core is then summarized as a histogram of centrality values.
- (E) Hierarchical clustering of cores on the basis of their tumor closeness centrality histograms. The upper and lower outset tumor graphs correspond to the right and left tissue core images in Figure 4C, respectively. Scale bar in tumor graphs represents 150 μm.
- (F) Comparison of tumor closeness centrality between BC subtypes. Lines in boxes indicate the medians, and whiskers indicate data within 1.5× interquartile range of the upper and lower quartiles. Outliers are shown as distinct points. Groupwise comparisons of mean tumor closeness centrality were made by using one-way Welch ANOVA and Games-Howell post-hoc test. \*p = 0.016, \*\*p = 0.0099, \*\*\*p = 0.0010 (TN, n = 47; HR<sup>+</sup>HER2<sup>-</sup>; HR<sup>-</sup>HER2<sup>+</sup>, n = 53; HR<sup>+</sup>HER2<sup>+</sup>, n = 28).

Received: January 25, 2021  
Revised: April 17, 2021  
Accepted: June 23, 2021  
Published: July 23, 2021

## REFERENCES

- Ali, H.R., Glont, S.E., Blows, F.M., Provenzano, E., Dawson, S.J., Liu, B., Hiller, L., Dunn, J., Poole, C.J., Bowden, S., et al. (2015). Pd-I1 protein expression in breast cancer is rare, enriched in basal-like tumours and associated with infiltrating lymphocytes. *Ann. Oncol.* **26**, 14881493.
- Angelo, M., Bendall, S.C., Finck, R., Hale, M.B., Hitzman, C., Borowsky, A.D., Levenson, R.M., Lowe, J.B., Liu, S.D., Zhao, S., et al. (2014). Multiplexed ion beam imaging (MIBI) of human breast tumors. *Nat. Med.* **20**, 436442.
- Bianchini, G., Balko, J.M., Mayer, I.A., Sanders, M.E., and Gianni, L. (2016). Triple-negative breast cancer: challenges and opportunities of a heterogeneous disease. *Nat. Rev. Clin. Oncol.* **13**, 674690.
- Bokeh Development Team (2020). Bokeh: Python library for interactive visualization. <https://bokeh.org/>.
- Brechbuhl, H.M., Finlay-Schultz, J., Yamamoto, T.M., Gillen, A.E., Cittel, D.M., Tan, A.-C., Sams, S.B., Pillai, M.M., Elias, A.D., Robinson, W.A., et al. (2017). Fibroblast subtypes regulate responsiveness of luminal breast cancer to estrogen. *Clin. Cancer Res.* **23**, 17101721.
- Bulun, S.E., Chen, D., Moy, I., Brooks, D.C., and Zhao, H. (2012). Aromatase, breast cancer and obesity: a complex interaction. *Trends Endocrinology Metabolism: TEM* **23**, 83–89.
- Butler, A., Hoffman, P., Smibert, P., Papalexi, E., and Satija, R. (2018). Integrating single-cell transcriptomic data across different conditions, technologies, and species. *Nat. Biotechnol.* **36**, 411–420.
- Chang, Y.H., Chin, K., Thibault, G., Eng, J., Burlingame, E., and Gray, J.W. (2020). Restore: robust intensity normalization method for multiplexed imaging. *Commun. Biol.* **3**, 1–9.
- Chen, X., Hu, H., He, L., Yu, X., Liu, X., Zhong, R., and Shu, M. (2016). A novel subtype classification and risk of breast cancer by histone modification profiling. *Breast Cancer Res. Treat.* **157**, 267–279.
- Dask Development Team (2016). Dask: library for dynamic task scheduling. <https://dask.org/>.
- Dowsett, M., Allred, C., Knox, J., Quinn, E., Salter, J., Wale, C., Cuzick, J., Houghton, J., Williams, N., Mallon, E., et al. (2008). Relationship between quantitative estrogen and progesterone receptor expression and human epidermal growth factor receptor 2 (her-2) status with recurrence in the arimidex, tamoxifen, alone or in combination trial. *J. Clin. Oncol.* **26**, 1059–1065.
- Eng, J., Thibault, G., Luoh, S.-W., Gray, J.W., Chang, Y.H., and Chin, K. (2020). Cyclic multiplexed-immunofluorescence (cmIF), a highly multiplexed method for single-cell analysis. In *Methods in Molecular Biology* (Springer), pp. 521–562.
- Garaud, S., Buisseret, L., Solinas, C., Gu-Trantien, C., de Wind, A., Van den Eynden, G., Naveaux, C., Lodewyckx, J.-N., Boisson, A., Duvillier, H., et al. (2019). Tumor-infiltrating B cells signal functional humoral immune responses in breast cancer. *JCI Insight* **4**. <https://insight.jci.org/articles/view/129641>.
- Giesen, C., Wang, H.A.O., Schapiro, D., Zivanovic, N., Jacobs, A., Hattendorf, B., Schüffler, P.J., Grolimund, D., Buhmann, J.M., Brandt, S., et al. (2014). Highly multiplexed imaging of tumor tissues with subcellular resolution by mass cytometry. *Nat. Methods* **11**, 417422.
- Goltsev, Y., Samusik, N., Kennedy-Darling, J., Bhate, S., Hale, M., Vazquez, G., Black, S., and Nolan, G.P. (2018). Deep profiling of mouse splenic architecture with codex multiplexed imaging. *Cell* **174**, 968–981.e15.
- Hagberg, A.A., Schult, D.A., and Swart, P.J. (2008). Exploring network structure, dynamics, and function using networkx. In *Proceedings of the 7th Python in Science Conference*, Pasadena, CA USA, G. Varoquaux, T. Vaught, and J. Millman, eds., pp. 11–15.
- Haupt, B., Ro, J.Y., and Schwartz, M.R. (2010). Basal-like breast carcinoma: a phenotypically distinct entity. *Arch. Pathol. Lab. Med.* **134**, 130133.
- Hunter, J.D. (2007). Matplotlib: a 2d graphics environment. *Comput. Sci. Eng.* **9**, 90–95.
- Jackson, H.W., Fischer, J.R., Zanotelli, V.R.T., Ali, H.R., Mechera, R., Soysal, S.D., Moch, H., Muenst, S., Varga, Z., Weber, W.P., et al. (2020). The single-cell pathology landscape of breast cancer. *Nature* **578**, 615620.
- Keren, L., Bosse, M., Marquez, D., Angostari, R., Jain, S., Varma, S., Yang, S.-R., Kurian, A., Valen, D.V., West, R., et al. (2018). A structured tumor-immune microenvironment in triple negative breast cancer revealed by multiplexed ion beam imaging. *Cell* **174**, 1373–1387.e19.
- Levine, J.H., Simonds, E.F., Bendall, S.C., Davis, K.L., Amir, E.-a. D., Tadmor, M.D., Litvin, O., Fienberg, H.G., Jager, A., Zunder, E.R., et al. (2015). Data-driven phenotypic dissection of AML reveals progenitor-like cells that correlate with prognosis. *Cell* **162**, 184197.
- Lin, J.-R., Izar, B., Wang, S., Yapp, C., Mei, S., Shah, P.M., Santagata, S., and Sorger, P.K. (2018). Highly multiplexed immunofluorescence imaging of human tissues and tumors using t-CyCIF and conventional optical microscopes. *eLife* **7**, e31657.
- Liu, X., Song, W., Wong, B.Y., Zhang, T., Yu, S., Lin, G.N., and Ding, X. (2019). A comparison framework and guideline of clustering methods for mass cytometry data. *Genome Biol.* **20**, 297.
- Okuta, R., Unno, Y., Nishino, D., Hido, S., and Loomis, C. (2017). CuPy: a NumPy-compatible library for NVIDIA GPU calculations. In *Proceedings of Workshop on Machine Learning Systems (LearningSys) in the Thirty-First Annual Conference on Neural Information Processing Systems (NeurIPS)*, P. 7.
- Prat, A., Pineda, E., Adamo, B., Galván, P., Fernández, A., Gaba, L., Díez, M., Viladot, M., Arance, A., and Muñoz, M. (2015). Clinical implications of the intraduct molecular subtypes of breast cancer. *The Breast* **24**, S26S35.
- Raschka, S., Patterson, J., and Nolet, C. (2020). Machine learning in python: main developments and technology trends in data science, machine learning, and artificial intelligence. *arXiv*, arXiv:2002.04803.
- Rozenblatt-Rosen, O., Regev, A., Oberdoerffer, P., Nawy, T., Hupalowska, A., Rood, J.E., Ashenberg, O., Cerami, E., Coffey, R.J., Demir, E., et al. (2020). The human tumor atlas network: charting tumor transitions across space and time at single-cell resolution. *Cell* **181**, 236249.
- Rudiger, P., Stevens, J.-L., Bednar, J.A., Nijholt, B., Andrew, B.C., Tenner, V., Mease, J., Randelhoff, A., Maxalbert, Kaiser, M., et al. (2019). holoviz/holoviews: version 1.12.7. <https://doi.org/10.5281/zenodo.3551257>.
- Schapiro, D., Jackson, H.W., Raghuraman, S., Fischer, J.R., Zanotelli, V.R.T., Schulz, D., Giesen, C., Catena, R., Varga, Z., and Bodenmiller, B. (2017). histoCAT: analysis of cell phenotypes and interactions in multiplex image cytometry data. *Nat. Methods* **14**, 873876.
- Sofroniew, N., Evans, K., Lambert, T., Nunez-Iglesias, J., Solak, A.C., Yamauchi, K., Buckley, G., Tung, T., Bokota, G., Boone, P., Freeman, J., Har-Gil, H., Royer, L., Axelrod, S., jakirkham, Dunham, R., Vemuri, P., Huang, M., Hector, Bryant, Rokem, A., Kiggins, J., van Kemenade, H., Patterson, H., Gay, G., Perlman, E., Bennett, D., Gohlke, C., Chopra, B., and de Siqueira, A. (2020). napari/napari: 0.3.0. <https://doi.org/10.5281/zenodo.3785908>.
- Tsujikawa, T., Kumar, S., Borkar, R.N., Azimi, V., Thibault, G., Chang, Y.H., Balter, A., Kawashima, R., Choe, G., Sauer, D., et al. (2017). Quantitative multiplex immunohistochemistry reveals myeloid-inflamed tumor-immune complexity associated with poor prognosis. *Cell Rep.* **19**, 203217.
- Vallat, R. (2018). Pingouin: statistics in python. *J. Open Source Softw.* **3**, 1026.
- van der Maaten, L., and Hinton, G. (2008). Visualizing data using t-SNE. *J. Machine Learn. Res.* **9**, 25792605.
- Van Gassen, S., Callebaut, B., Van Helden, M.J., Lambrecht, B.N., Demeester, P., Dhaene, T., and Saey, Y. (2015). FlowSOM: using self-organizing maps for visualization and interpretation of cytometry data. *Cytometry. Part A: J. Int. Soc. Anal. Cytol.* **87**, 636645.

Virtanen, P., Gommers, R., Oliphant, T.E., Haberland, M., Reddy, T., Cournapeau, D., Burovski, E., Peterson, P., Weckesser, W., Bright, J., et al.; SciPy 1.0 contributors (2020). SciPy 1.0: fundamental algorithms for scientific computing in python. *Nat. Methods* 17, 261–272.

Waskom, M.; seaborn development team (2020). seaborn: statistical data visualization. <https://doi.org/10.5281/zenodo.592845>.

Weber, L.M., and Robinson, M.D. (2016). Comparison of clustering methods for high-dimensional single-cell flow and mass cytometry data. *Cytometry A* 89, 10841096.

Wimberly, H., Brown, J.R., Schalper, K., Haack, H., Silver, M.R., Nixon, C., Bossuyt, V., Pusztai, L., Lannin, D.R., and Rimm, D.L. (2015). Pd-1 expression correlates with tumor-infiltrating lymphocytes and response to neoadjuvant chemotherapy in breast cancer. *Cancer Immunol. Res.* 3, 326332.



**STAR★METHODS**

**KEY RESOURCES TABLE**

| REAGENT or RESOURCE                                  | SOURCE                    | IDENTIFIER       |
|------------------------------------------------------|---------------------------|------------------|
| <b>Antibodies</b>                                    |                           |                  |
| Rabbit anti-CD20 (clone EP459Y)                      | Abcam                     | Cat#ab198941     |
| Rabbit anti-CD4 (clone EPR6855)                      | Abcam                     | Cat#ab196147     |
| Rabbit anti-CD44 (clone EPR1013Y)                    | Abcam                     | Cat#ab216647     |
| Rabbit anti-CD45 (clone EP322Y)                      | Abcam                     | Cat#ab214437     |
| Mouse anti-CD68 (clone KP1)                          | Biolegend                 | Cat#916104       |
| Mouse anti-FOXP3 (clone 206D)                        | Biolegend                 | Cat#320102       |
| Rabbit anti-Granzyme B (GRNZB) (clone EPR20129-217)  | Abcam                     | Cat#ab219803     |
| Rabbit anti-Cytokeratin 5 (CK5) (clone EP1601Y)      | Abcam                     | Cat#ab193894     |
| Mouse anti-Cytokeratin 14 (CK14) (clone LL002)       | Abcam                     | Cat#ab212547     |
| Rabbit anti-Cytokeratin 17 (CK17) (clone EP1623)     | Abcam                     | Cat#ab185032     |
| Rabbit anti-Cytokeratin 7 (CK7) (clone EPR1619Y)     | Abcam                     | Cat#ab185048     |
| Rabbit anti-Cytokeratin 8 (CK8) (clone EP1628Y)      | Abcam                     | Cat#ab192467     |
| Mouse anti-Cytokeratin 19 (CK19) (clone A53-B/A2)    | Biolegend                 | Cat#628502       |
| Rabbit anti-E Cadherin (Ecad) (clone EP700Y)         | Abcam                     | Cat#ab201499     |
| Rabbit anti-Androgen Receptor (AR) (polyclonal)      | Sigma-Aldrich             | Cat#06-680-AF555 |
| Rabbit anti-Estrogen Receptor (ER) (clone EPR4097)   | Abcam                     | Cat#ab205851     |
| Rabbit anti-Progesterone Receptor (PgR) (clone YR85) | Abcam                     | Cat#ab199455     |
| Mouse anti-HER2 (clone 3B5)                          | Santa Cruz                | Cat#sc-33684     |
| Mouse anti- $\alpha$ SMA (clone 3B5)                 | Santa Cruz                | Cat#sc-32251     |
| Rabbit anti-CD31 (clone EPR3094)                     | Abcam                     | Cat#ab218582     |
| Rabbit anti-Vimentin (Vim) (clone D21H3)             | Cell Signaling Technology | Cat#9854         |
| Rabbit anti-Collagen I (Coll) (clone EPR7785)        | Abcam                     | Cat#ab215969     |
| Mouse anti-Collagen IV (ColIV) (clone 1042)          | ThermoFisher              | Cat#51-9871-82   |
| Mouse anti-Lamin A/C (LamA/C) (clone 4C11)           | Sigma-Aldrich             | Cat#SAB4200236   |
| Rabbit anti-Lamin B1 (LamB1) (clone EPR8985(B))      | Abcam                     | Cat#ab194106     |
| Rabbit anti-Lamin B2 (LamB2) (clone EPR9701(B))      | Abcam                     | Cat#ab200427     |
| Rabbit anti-H3K4me3 (clone C42D8)                    | Cell Signaling Technology | Cat#11960        |
| Rabbit anti-H3K27me3 (clone C36B11)                  | Cell Signaling Technology | Cat#5499         |
| Mouse anti-Podoplanin (PDPN) (polyclonal)            | Biolegend                 | Cat#916606       |

(Continued on next page)

| <i>Continued</i>                                     |                                                               |                                                                                                         |
|------------------------------------------------------|---------------------------------------------------------------|---------------------------------------------------------------------------------------------------------|
| REAGENT or RESOURCE                                  | SOURCE                                                        | IDENTIFIER                                                                                              |
| Rabbit anti-Cleaved PARP (cPARP) (clone D64E10)      | Cell Signaling Technology                                     | Cat#6894                                                                                                |
| Rabbit anti-gH2AX (clone EP854(2)Y)                  | Abcam                                                         | Cat#ab195189                                                                                            |
| Rabbit anti-Ki67 (clone D3B5)                        | Cell Signaling Technology                                     | Cat#12075                                                                                               |
| Mouse anti-PCNA (clone PC10)                         | Cell Signaling Technology                                     | Cat#8580                                                                                                |
| Rabbit anti-pHH3 (clone D2C8)                        | Cell Signaling Technology                                     | Cat#3465                                                                                                |
| Rabbit anti-p-S6 (clone D57.2.2E)                    | Cell Signaling Technology                                     | Cat#3985                                                                                                |
| <b>Biological samples</b>                            |                                                               |                                                                                                         |
| Breast cancer tissue array                           | US Biomax Inc.                                                | BR1201a                                                                                                 |
| Breast cancer tissue array                           | US Biomax Inc.                                                | BR1506                                                                                                  |
| Breast cancer tissue array                           | US Biomax Inc.                                                | Her2B                                                                                                   |
| Breast cancer tissue array                           | <a href="#">Dowsett et al., 2008</a>                          | T-ATAC-4A                                                                                               |
| <b>Chemicals, peptides, and recombinant proteins</b> |                                                               |                                                                                                         |
| SlowFade Gold Antifade Mountant with DAPI            | Life Technologies                                             | Cat#S36938                                                                                              |
| Normal Goat Serum (NGS)                              | Vector Laboratories                                           | Cat#S-1000                                                                                              |
| Bovine Serum Albumin (BSA)                           | Sigma-Aldrich                                                 | Cat#A7906                                                                                               |
| Phosphate Buffered Saline (PBS)                      | Fisher Scientific                                             | Cat#BP39920                                                                                             |
| Target Retrieval Solution, pH 9                      | Agilent                                                       | Cat#S236784-2                                                                                           |
| <b>Deposited data</b>                                |                                                               |                                                                                                         |
| Single-cell feature data (OHSU CyCIF)                | This paper                                                    | 10.5281/zenodo.4908899                                                                                  |
| Single-cell feature data (Basel IMC)                 | <a href="#">Jackson et al., 2020</a>                          | 10.5281/zenodo.3518284                                                                                  |
| <b>Software and algorithms</b>                       |                                                               |                                                                                                         |
| PhenoGraph                                           | <a href="#">Levine et al., 2015</a>                           | <a href="https://github.com/dpeerlab/phenograph">https://github.com/dpeerlab/phenograph</a>             |
| RESTORE                                              | <a href="#">Chang et al., 2020</a>                            | <a href="https://gitlab.com/Chang_Lab/cycif_int_norm/">https://gitlab.com/Chang_Lab/cycif_int_norm/</a> |
| Code for analysis and figure generation              | This paper                                                    | <a href="https://gitlab.com/eburling/BCTMA">https://gitlab.com/eburling/BCTMA</a>                       |
| CuPy                                                 | <a href="#">Okuta et al., 2017</a>                            | <a href="https://cupy.dev/">https://cupy.dev/</a>                                                       |
| SciPy                                                | <a href="#">Virtanen et al., 2020</a>                         | <a href="https://www.scipy.org/">https://www.scipy.org/</a>                                             |
| Grapheno                                             | This paper                                                    | <a href="https://gitlab.com/eburling/grapheno">https://gitlab.com/eburling/grapheno</a>                 |
| NetworkX                                             | <a href="#">Hagberg et al., 2008</a>                          | <a href="https://networkx.org/">https://networkx.org/</a>                                               |
| Pingouin                                             | <a href="#">Vallat, 2018</a>                                  | <a href="https://pingouin-stats.org/">https://pingouin-stats.org/</a>                                   |
| Seaborn                                              | <a href="#">Waskom and the seaborn development team, 2020</a> | <a href="https://seaborn.pydata.org/">https://seaborn.pydata.org/</a>                                   |
| Holoviews                                            | <a href="#">Rudiger et al., 2019</a>                          | <a href="http://holoviews.org/">http://holoviews.org/</a>                                               |
| Bokeh                                                | <a href="#">Bokeh Development Team, 2020</a>                  | <a href="https://docs.bokeh.org">https://docs.bokeh.org</a>                                             |
| Matplotlib                                           | <a href="#">Hunter, 2007</a>                                  | <a href="https://matplotlib.org/">https://matplotlib.org/</a>                                           |
| Napari                                               | <a href="#">Sofroniew et al., 2020</a>                        | <a href="https://napari.org/">https://napari.org/</a>                                                   |
| RAPIDS                                               | <a href="#">Raschka et al., 2020</a>                          | <a href="https://rapids.ai/">https://rapids.ai/</a>                                                     |
| Dask                                                 | <a href="#">Dask Development Team, 2016</a>                   | <a href="https://dask.org/">https://dask.org/</a>                                                       |
| <b>Other</b>                                         |                                                               |                                                                                                         |
| 24x50 mm rectangular #1½ cover glass                 | Corning                                                       | Cat#2980-245                                                                                            |
| 24x30 mm rectangular #1½ cover glass                 | Corning                                                       | Cat#2980-243                                                                                            |
| Slide chambers                                       | Bio-Rad                                                       | Cat#SLF0601                                                                                             |
| Tabletop incubator                                   | Clinical Scientific Equipment Inc.                            | No. 100                                                                                                 |
| Hybridization incubator                              | Robbins Scientific                                            | Model 1000                                                                                              |
| Decloaking chamber                                   | Biocare Medical                                               | Cat#DC2012                                                                                              |

## RESOURCE AVAILABILITY

### Lead contact

Further information and requests for resources and reagents should be directed to and will be fulfilled by the Lead Contact, Young Hwan Chang ([chanyo@ohsu.edu](mailto:chanyo@ohsu.edu)).

### Materials availability

This study did not generate new unique reagents.

### Data and code availability

The single-cell feature data have been deposited on Zenodo and are publicly available as of the date of publication. The DOI is listed in the [key resources table](#). The code use for analysis and figure generation is publicly available at <https://gitlab.com/eburling/BCTMA>. The GPU-accelerated implementation of PhenoGraph is publically available at <https://gitlab.com/eburling/grapheno>. Any additional information required to reanalyze the data reported in this paper is available from the lead contact upon request.

## EXPERIMENTAL MODEL AND SUBJECT DETAILS

### Acquisition of breast cancer tissue microarrays (TMAs)

The tissues used in this study are a compilation of multiple TMAs: BR1201a-SG48 (US Biomax Inc., <https://www.biomax.us/BR1201a>), BR1506-A019 (US Biomax Inc., <https://www.biomax.us/tissue-arrays/Breast/BR1506>), Her2B-K154 (US Biomax Inc., <https://www.biomax.us/tissue-arrays/Breast/Her2B>), and the TransATAC TMAs T-ATAC-4A-Left and T-ATAC-4A-Right (Dowsett et al., 2008). All tissues that were successfully stained and imaged were included in the study, representing 180 tissue cores from 128 patients.

## METHOD DETAILS

### Preparation and cyclic immunofluorescence (CyCIF) staining of tissues

Formalin-fixed paraffin-embedded (FFPE) human tissues were received mounted on adhesive slides. The slides were baked overnight in an oven at 55°C (Robbin Scientific, Model 1000) and an additional 30 minutes at 65°C (Clinical Scientific Equipment, NO. 100). Tissues were deparaffinized with xylene and rehydrated with graded ethanol baths. Two step antigen retrieval was performed in the Decloaking Chamber (Biocare Medical) using the following settings: set point 1 (SP1), 125°C, 30 seconds; SP2: 90°C, 30 seconds; SP limit: 10°C. Slides were further incubated in hot Target Retrieval Solution, pH 9 (Agilent, S236784-2) for 15 minutes. Slides were then washed in two brief changes of diH<sub>2</sub>O (~2 seconds) and once for 5 minutes in 1x phosphate buffered saline (PBS), pH 7.4 (Fisher, BP39920). Sections were blocked in 10% normal goat serum (NGS, Vector S-1000), 1% bovine serum albumin (BSA, Sigma A7906) in PBS for 30 minutes at 20°C in a humid chamber, followed by PBS washes. Primary antibodies were diluted in 5% NGS, 1% BSA in 1x PBS and applied overnight at 4°C in a humid chamber, covered with plastic coverslips (Bio-Rad, SLF0601). Following overnight incubation, tissues were washed 3 x 10 min in 1x PBS. Coverslips (Corning; 2980-243 or 2980-245) were mounted in Slowfade Gold plus DAPI mounting media (Life Technologies, S36938).

### Fluorescence microscopy

Fluorescently stained slides were scanned on the Zeiss AxioScan.Z1 (Zeiss, Germany) with a Colibri 7 light source (Zeiss). The filter cubes used for image collection were DAPI (Zeiss 96 HE), Alexa Fluor 488 (AF488, Zeiss 38 HE), AF555 (Zeiss 43 HE), AF647 (Zeiss 50) and AF750 (Chroma 49007 ET Cy7). The exposure time was determined individually for each slide and stain to ensure good dynamic range but not saturation. Full tissue scans were taken with the 20x objective (Plan-Apochromat 0.8NA WD=0.55, Zeiss) and stitching was performed in Zen Blue image acquisition software (Zeiss).

### Quenching fluorescence signal

After successful scanning, slides were soaked in 1x PBS for 10–30 minutes in a glass Coplin jar, waiting until glass coverslip slid off without agitation. Quenching solution containing 20 mM sodium hydroxide (NaOH) and 3% hydrogen peroxide (H<sub>2</sub>O<sub>2</sub>) in 1x PBS was freshly prepared from stock solutions of 5 M NaOH and 30% H<sub>2</sub>O<sub>2</sub>, and each slide placed in 10 ml quenching solution. Slides were quenched under incandescent light, for 30 minutes for FFPE tissue slides. Slides were then removed from chamber with forceps and washed 3 x 2 min in 1x PBS. The next round of primary antibodies was applied, diluted in blocking buffer as previously described, and imaging and quenching were repeated over ten rounds for FFPE tissue slides.

### Cell segmentation and mean intensity extraction

Cell segmentation and mean intensity extraction were performed as previously described (Eng et al., 2020). The nuclei and cells segmentation are performed using mathematical morphology. The process starts by segmenting the nuclei:

1. The DAPI image contrast is equalized using contrast-limited adaptive histogram equalization to remove illumination and staining irregularities.
2. The equalized DAPI image is cleaned by removing noise and artifacts as well as flattening the texture using an alternative sequential filter (alternation of opening and closing with structuring elements of increasing size).
3. A white top-hat filter is applied to separate the nuclei from the remaining background.
4. Area openings and closings (opening/closing based on the surface instead of a structuring element) are performed to flatten nuclei texture.
5. An ultimate opening is employed to find nuclei centers.
6. Nuclei centers are used as seeds in a watershed algorithm applied on the Sobel gradient of the original image, which provides the final nuclei segmentation.
7. For cell segmentation, nuclear segmentation masks are used as seeds in another watershed algorithm applied on a gradients combination of the markers CD44, CD45, CK7, CK19, and E-cadherin.

Mean intensities for each cell were extracted from the biologically-relevant compartment for each marker, i.e. mean intensities for markers with known nuclear (cytoplasmic) localization were extracted from nuclear (cytoplasmic) segmentation masks (Table S1). Cytoplasmic segmentation masks were computed by subtracting nuclear segmentation masks from full cell body segmentation masks.

### Single-cell intensity normalization

Normalization factors for single-cell mean intensities were computed as previously described (Chang et al., 2020) using the putative mutually-exclusive marker pairs in Table S1. Normalization factors are computed for each pair of reference and mutually-exclusive markers, and the median of these factors is used to normalize each raw single-cell mean intensity vector for each CyCIF marker and each TMA core. Raw intensities were normalized using the equation:

$$\hat{\mathbf{x}}_{ij} = \frac{\mathbf{x}_{ij} - \min(\mathbf{x}_{ij})}{\varphi_{ij} - \min(\mathbf{x}_{ij})}, \quad (\text{Equation 1})$$

where  $\hat{\mathbf{x}}_{ij}$  and  $\mathbf{x}_{ij}$  are the normalized and raw single-cell mean intensity vectors for CyCIF marker  $i$  for all cells in tissue core  $j$ , respectively, and  $\varphi_{ij}$  is the corresponding normalization factor determined as described above. Therefore, cells with a normalized intensity greater than 1 are considered to be above the background intensity level.

### Single-cell phenotyping algorithm selection

PhenoGraph was used to define breast cancer cell types in a related study (Jackson et al., 2020), so we opted to use PhenoGraph in the current study to enable a fair comparison of the cell types defined between studies. Furthermore, the relatively slow runtime of CPU-executed PhenoGraph motivated our GPU-accelerated implementation.

### GPU acceleration of PhenoGraph

Given a cell-by-feature dataframe, the PhenoGraph algorithm (Levine et al., 2015) consists of two primary steps: (1) defining a  $k$ -nearest neighbor graph over all cells that is then refined by computing the Jaccard similarity measure over graph edges, and (2) partitioning the graph into discrete cell phenotypes through optimization of partition modularity using the Louvain algorithm, such that cells in the same partition are more connected to each other than to cells of another partition. In the official version of PhenoGraph (<https://github.com/dpeerlab/PhenoGraph>), these steps are implemented using a combination of Python and C++ libraries that execute on CPU. In Figure 1A, we show that PhenoGraph execution time increases exponentially with increasing dataset size, taking approximately 3 hours to process a synthetic 1 million cell-by-10 feature dataset. Most MTI datasets measure tens of features, but CPU-based PhenoGraph was unable to fully process the 1 million cell-by-30- and 50-feature synthetic datasets in the 8 hours allotted for the experiment. We see such computational bottlenecks—which would be even further constricted when compiling multiple MTI or cytometry datasets—as a major obstacle to current studies and future meta-studies of high-dimensional MTI datasets, where rapid iteration will be essential to the validation of cross-platform data integration techniques.

Owing to recent advances in GPU computing and its ever-broadening adoption in machine learning research, there now exist accelerated GPU-based analogs of many Python scientific computing libraries (Raschka et al., 2020; Okuta et al., 2017), including those with which the CPU-based PhenoGraph is implemented. Some of these libraries even allow computation to be distributed across multiple GPUs (Raschka et al., 2020; Dask Development Team, 2016). We employed two of such libraries, CuPy (Okuta et al., 2017) and RAPIDS (Raschka et al., 2020), to accelerate each step of the PhenoGraph algorithm and enable distributed computing over multiple GPUs. For example, for a synthetic dataset containing 50,000 samples and 50 features, the GPU implementation realizes a 354-fold speed up in the graph building and refinement step (97.3 seconds for CPU vs. 0.275 seconds for GPU) and a 141-fold speed up in the Louvain partitioning step (11.2 seconds for CPU vs. 0.0795 seconds for GPU). With our GPU implementation, it is now possible to phenotype cells in megascale cytometry datasets in seconds-to-minutes rather than hours-to-days, and without subsampling. We have packaged our GPU implementation into a Python library called



*grapheno* and have adopted the API from the official CPU implementation of PhenoGraph found at <https://github.com/dpeerialab/phenograph>. To run a simple clustering of synthetic data:

```
import cudf
import cuml
import grapheno
X, _ = cuml.make_blobs()
X = cudf.DataFrame.from_records(X)
communities, G, Q = grapheno.cluster(X)
```

In practice, *X* can be any single-cell dataframe with cells as rows and features as columns. For a dataframe with *N* cells, *communities* will be a vector of length *N* specifying the cluster label for each cell. *G* is a RAPIDS graph object representing the relationships between cells that were used for clustering. *Q* is the modularity score for the clustering result defined by *communities*. Installation instructions and full details about our implementation can be found at <https://gitlab.com/eburling/grapheno>.

### Benchmarking CPU and GPU implementations of PhenoGraph

To ensure that our GPU implementation of PhenoGraph produced results consistent with the CPU implementation, we benchmarked each using synthetic datasets which varied in terms of number of samples and number of features (Figures S3B–S3D). Synthetic data were generated using the `make_classification` function from the RAPIDS library, using the settings `n_classes=16`, `class_sep=4`, and `weights=list(np.random.dirichlet(np.ones(16*5)))` to randomly scale the proportion of samples in each class. Examples of clustering results for each implementation are shown in Figure S3B. To check for differences in clustering results, we compared the purity and modularity of clusters derived using either CPU or GPU implementations and the same parameterization (*k* = 40). Purity measures the percentage of correctly clustered objects—in this case the percentage of agreement between clustering results from each implementation—and is calculated as:

$$Purity = \frac{1}{N} \sum_{i=1}^m \max_j |c_i \cap t_j| \quad (\text{Equation 2})$$

where *N* is the total number of objects, *m* is the number of clusters from the CPU implementation, *c<sub>i</sub>* is the *i*-th cluster from the CPU implementation, and *t<sub>j</sub>* is the cluster from the GPU implementation which has the maximum number of objects from the cluster *c<sub>i</sub>*. The CPU and GPU implementations yielded almost identical clustering results, i.e. >= 0.9999 inter-implementation cluster purity for all combinations of `n_sample` and `n_features` (Figure S3C). Modularity (*Q*) is the quantity optimized by the Louvain algorithm used by PhenoGraph to partition *k*-nearest neighbor graphs of cells into clusters of similar cells. As anticipated based on the tight agreement between cluster results between implementations, we detected no significant difference between CPU and GPU clustering modularity (Figure S3D). Very slight differences between clustering results correspond to a maximum of 0.003% of cells being mismatched between implementations and can be attributed to the degeneracy of Louvain partitioning.7.3.9

### Single-cell phenotyping and metacluster annotation

Apart from the benchmarking experiment described in Figure 1A, we use only our GPU-based implementation of PhenoGraph throughout this work. Single-cell phenotypes were defined based on single-cell mean intensity for the 35-marker CyCIF panel (STAR Methods). Prior to application of PhenoGraph, data were 99.9th-percentile normalized and arcsin transformed (cofactor = 5). Following (Jackson et al., 2020), PhenoGraph was parameterized (*k*=40) to over-cluster the data and detect rare cell types. PhenoGraph clustering was followed by aggregation of phenotypes into metaclusters based on hierarchical clustering of phenotype mean marker intensities and to preserve known biological variation.

### t-stochastic neighbor embedding (t-SNE)

To enable visualization, the full 35-feature single-cell dataset was reduced to 2 dimensions using the RAPIDS implementation of *t*-SNE (van der Maaten and Hinton, 2008) with default parameters except perplexity = 60. Prior to *t*-SNE processing, data were 99.9th-percentile normalized and arcsin transformed (cofactor = 5). Plots containing *t*-SNE embeddings of the full ~1.3 million-cell dataset were created using Datashader (<https://github.com/holoviz/datashader>).

### Cross-platform breast cancer cell phenotype validation

The imaging mass cytometry (IMC) dataset (Jackson et al., 2020) used for our cell phenotype validation experiment was retrieved from <https://zenodo.org/record/3518284>. To make a fair comparison between the OHSU (CyCIF) and Basel (IMC) datasets, we independently ran PhenoGraph on each using the same parameters (*k*=40, Louvain partitioning) and only the overlapping features between IMC and CyCIF stain panels (Figure 2B). The phenotypes derived from each platform were then cross-correlated to identify inter-platform phenotype matches. Using the `clustermap` function from `seaborn` (Waskom and the seaborn development team, 2020), the cross-correlation matrix was then hierarchically clustered with Ward linkage and used to sort the matching clusters between the two cohort heatmaps.

### Epithelial differentiation heterogeneity

Cells from each core were labeled as positive for each cytokeratin if their mean intensity was greater than the normalization factor computed for that cytokeratin for that core. The plot from Figure 3B was generated using UpSetPlot (<https://github.com/jnothman/UpSetPlot>). The CK heterogeneity of each core was computed by measuring the Shannon entropy of its distribution of CK-expressing cells. The homogeneity of variances assumption was met, so comparison of the CK heterogeneity over BC subtypes was made using the pairwise\_tukey function from pingouin (Vallat, 2018).

### Aggregation of immune, stromal, and tumor cell phenotypes

To enable high-level comparison of cell phenotype distribution over BC subtypes (Figures 3E and 4), cell metaclusters were aggregated into immune, stromal, and tumor groups with the following metacluster membership:

- immune = [B cell/T cell, B cell, T cell/macrophage, T cell, macrophage]
- stromal = [CD44+ endothelial, PDPN+/aSMA+ stromal, Coll+ stromal, Lamin+/Vimentin+ stromal, Coll+/PDPN+ stromal, Vimentin+ stromal, Vimentin+ endothelial]
- tumor = [Ecad+/CK low, CK5+, CK5+/CK14+, myoepithelial, CK+/H3K27me3+, epithelial low, CK14+, Ecad+/CK+, proliferating, apoptotic, H3K4me3+, HER2+/CK8+, ER+, HER2 low, HER2+/CK+, ER+/PgR+]

### Cell phenotype density

The density of each of the 27 cell metaclusters in each tissue core was measured by counting the number of cells of each metacluster in the core, then dividing the count by the area of the convex hull defined by the cell centroids of the core. Tissue cores were then hierarchically clustered based on their z-scored cell metacluster densities using the clustermap function with Ward linkage from seaborn (Waskom and the seaborn development team, 2020). The homogeneity of variances assumption was not met, so comparisons of immune, stromal, and tumor cell densities over BC subtypes were made using the pairwise\_gameshowell function from pingouin (Vallat, 2018).

### Tumor cell neighborhood interactions

To characterize the microenvironments of tumor cells across BC subtypes, we identified the cell metaclusters of the 10 nearest cells within 65  $\mu\text{m}$  (double the median of the minimum tumor-stromal distances across all tissue cores) of each tumor cell. Tumor cells were then split based on the BC subtype of the tissue from which they were derived, and counts for each metacluster were summed over all tumor cells such that each metacluster could be represented as a proportion of the total tumor neighborhood for each BC subtype.

To measure the extent of tumor-stromal cell interactions in each tissue core, we computed their stromal mixing scores, an adaptation of a previously described cell-cell mixing score (Keren et al., 2018). To focus on cores that had substantial stromal composition, we first selected cores which are comprised of at least 25% stromal cells and for each we defined a 10-nearest neighbor spatial graph over all cells in that core. Second, we removed edges between cells with an interaction distance greater than 65  $\mu\text{m}$ . Finally, we computed the stromal mixing score for tissue core  $j$  as:

$$(\text{stromal mixing})_j = \frac{(\# \text{ tumor - stromal interactions})_j}{(\# \text{ stromal - stromal interactions})_j} \quad (\text{Equation 3})$$

### Tumor graph centrality

To characterize tumor architecture in each tissue core, we considered the spatial interactions between tumor cells only. To account for variation in tissue core diameter (Figure S1A) which would affect the scale of spatial graph characteristics, we subsampled large diameter cores to be equal in size to the smallest diameter cores by only considering cells within the 300  $\mu\text{m}$ -radius circle drawn about the centroid of each core. With the spatially-subsampled cores, we first construct a 4-nearest neighbor spatial graph over all tumor cells in each core. Here we use  $k = 4$  rather than  $k = 10$  to construct a sparser graph since we are focusing on tumor cells only. Over this graph we compute the Wasserman-Faust closeness centrality of each cell using the closeness\_centrality function from the Python package networkx (Hagberg et al., 2008). The Wasserman-Faust closeness centrality of cell  $u$  is computed as:

$$C_{WF}(u) = \frac{n-1}{N-1} \frac{n-1}{\sum_{v=1}^{n-1} d(v, u)}, \quad (\text{Equation 4})$$

where  $d(v, u)$  is the shortest-path distance between cells  $v$  and  $u$ ,  $n$  is the number of cells that can reach  $u$ , and  $N$  is the number of cells in the graph. For heatmap visualization, the distribution of tumor cell centrality for each core was max-normalized, converted into a 50-bin histogram over range = (0, 1), then hierarchically clustered using the clustermap function from seaborn (Waskom and the seaborn development team, 2020) with Jensen-Shannon distance and average linkage.

### Plotting and visualization

Unless otherwise noted, all plots were generated using Holoviews (Rudiger et al., 2019) with either the Bokeh (Bokeh Development Team, 2020) or matplotlib (Hunter, 2007) backends. Images of CyCIF-stained tissue cores were generated using napari (Sofroniew et al., 2020).

### Computing hardware

The GPU-accelerated PhenoGraph implementation was developed and deployed on the NVIDIA V100 GPU with 32 GB memory, but the *grapheno* Python library can be compiled to work with any NVIDIA GPU.

### QUANTIFICATION AND STATISTICAL ANALYSIS

For statistical analyses, a  $p$  value of less than 0.05 was considered significant. For the groupwise comparisons in [Figure 3A](#), [3E](#), [4B](#), and [4F](#), we first tested the assumption of homogeneity of variances using the `bartlett` function from the Python package SciPy ([Virtanen et al., 2020](#)). When the assumption was (not) met, we made groupwise comparisons using one-way ANOVA with Tukey-HSD post-hoc test using the `pairwise_tukey` (one-way Welch ANOVA with Games-Howell post-hoc test using the `pairwise_gameshowell`) function from the Python package pingouin ([Vallat, 2018](#)). Additional statistical details can be found in the corresponding figure legends.

**Cell Reports Methods, Volume 1**

**Supplemental information**

**Toward reproducible, scalable, and robust data  
analysis across multiplex tissue imaging platforms**

**Erik A. Burlingame, Jennifer Eng, Guillaume Thibault, Koei Chin, Joe W. Gray, and Young  
Hwan Chang**



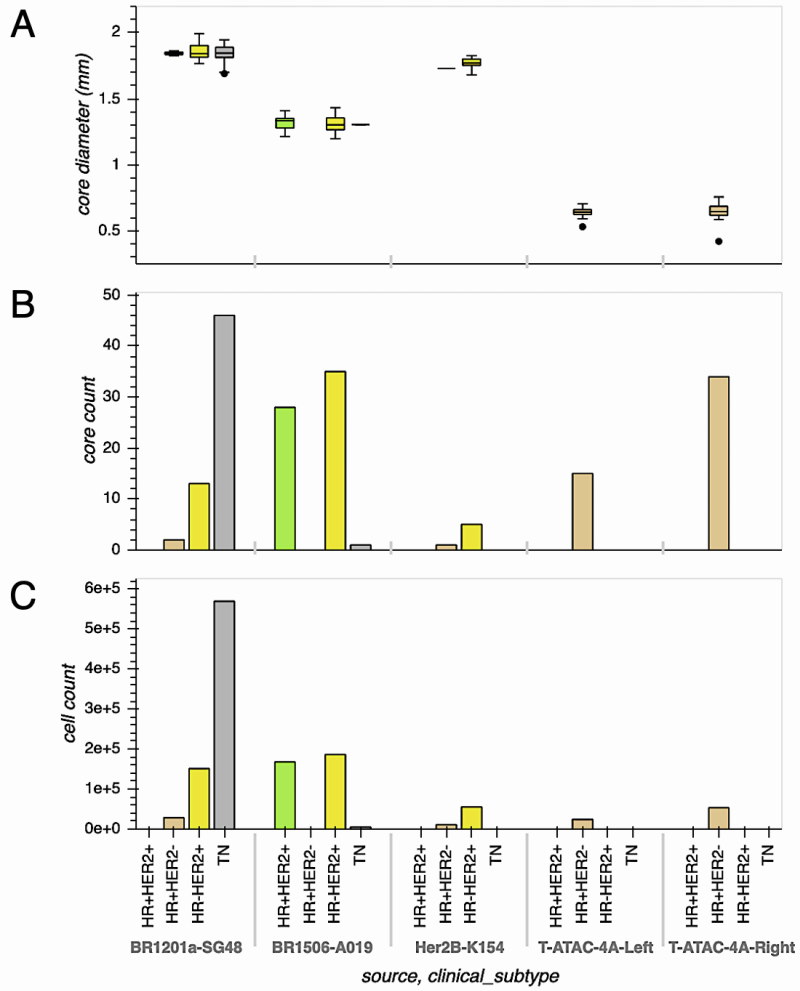

**Figure S1. Overview of TMA composition and CyCIF panel. Related to Figure 1.**

(A) Core diameters split by TMA source and BC subtype. Lines in boxes indicate the medians and whiskers indicate data within  $1.5 \times$  interquartile range of the upper and lower quartiles. Outliers are shown as distinct points.

(B) Core count split by TMA source and BC subtype. (C) Cell count split by TMA source and BC subtype.

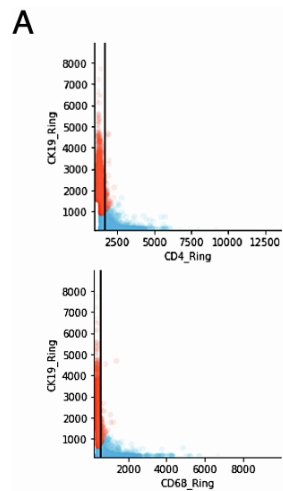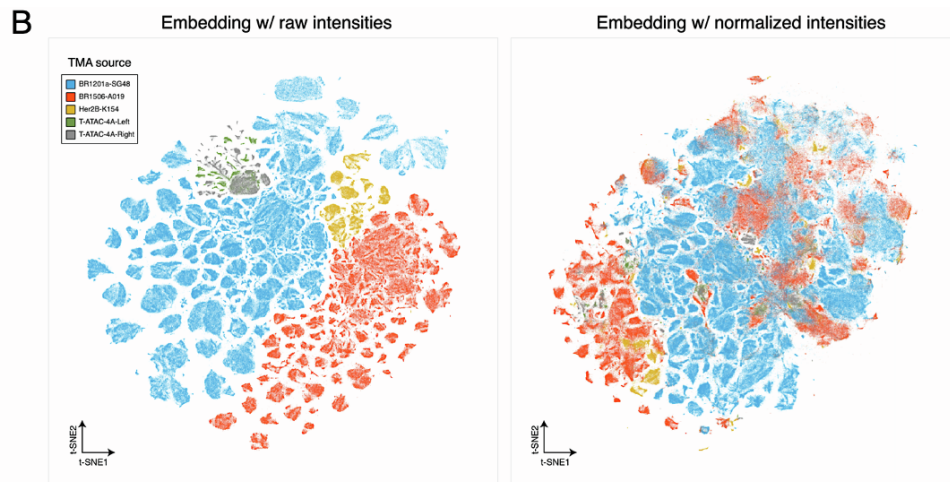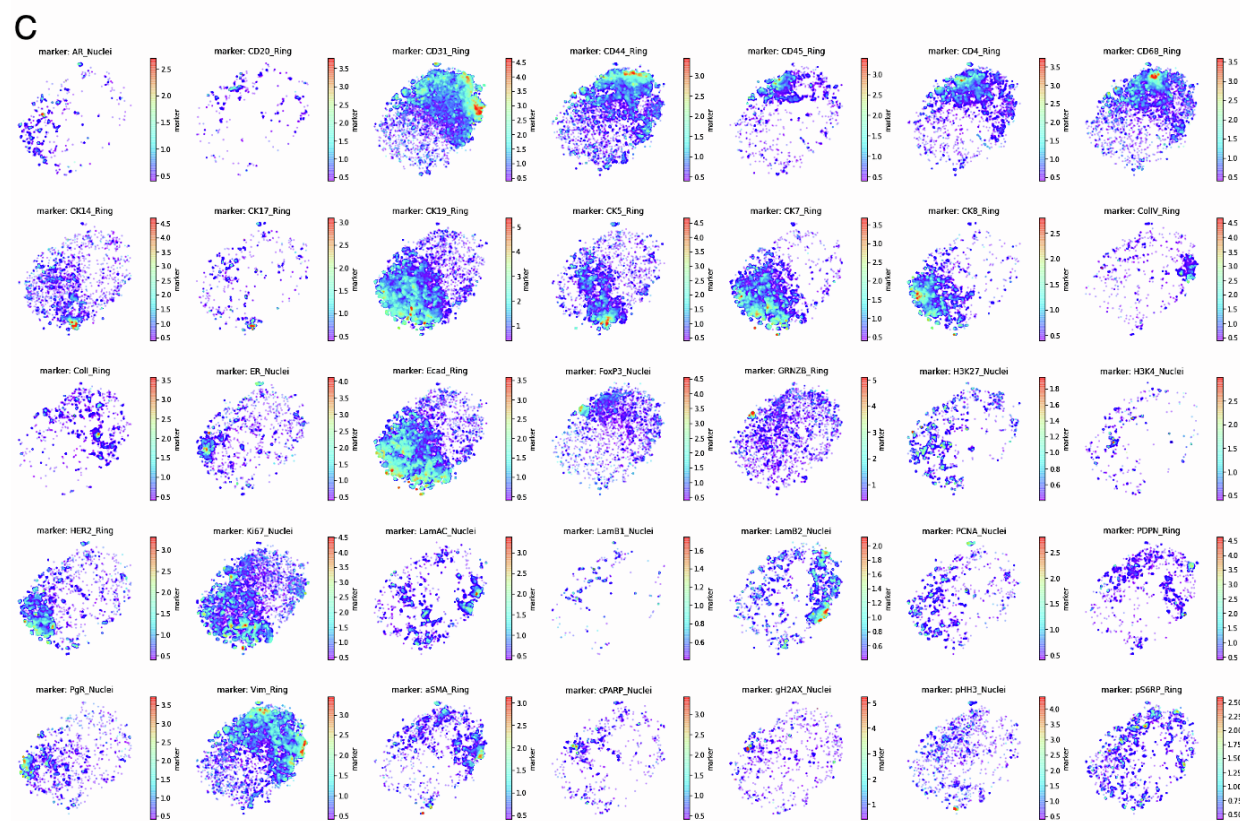

**Figure S2. Cell mean intensity normalization enables batch compilation of TMA data. Related to Figure 1 and STAR Methods.**

(A) Example of RESTORE normalization (Chang et al., 2020) of CD4 and CD68 cell mean intensities for a single TMA core. Cell mean intensities of these immune markers are plotted against the cell mean intensity of epithelial CK19, a mutually exclusive marker. Cells are partitioned into positive (blue) and negative (red) populations. Black lines represent the computed normalization factors. Cells to the right of each line are above the background intensity level for that immune marker. (B) *t*-SNE embeddings of all cells using either raw (left) or normalized (right) cell mean intensities for all markers. Cells are colored according to the TMA from which they originate. A strong batch effect is observed before normalization, leading to partitioning according to TMA of origin. Following normalization, cell phenotypes shared between TMAs are co-localized. However, some TMA-specific partitioning remains due to subtype-specific marker bias within TMAs. The coordinates used in the *t*-SNE plots at right are the same as those used in Figure 1B, where cells are colored by metacluster. In the plot in Figure 1B, it is clear that the HR+ and HER2+ tumor cells aggregated in the lower left correspond to the HR+ and HER2+ TMA cores from the BR1506, Her2B, and T-ATAC cohorts from Figure S2B. (C) *t*-SNE normalized embedding, faceted by marker, showing only cells that have a mean intensity above the normalization factor for that marker. Color scale is log-transformed normalized intensity.



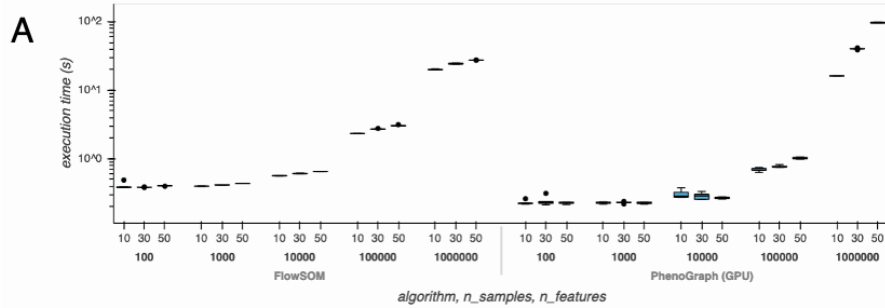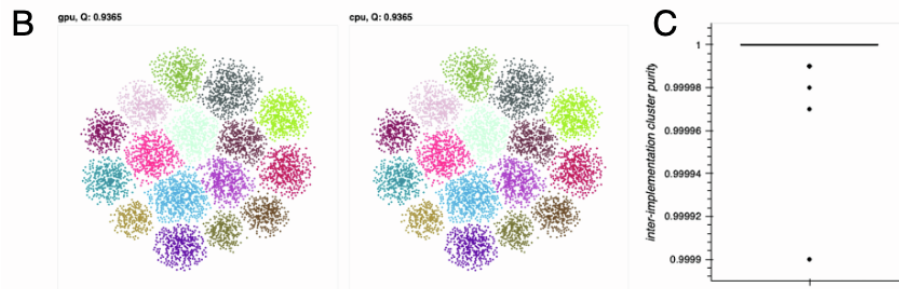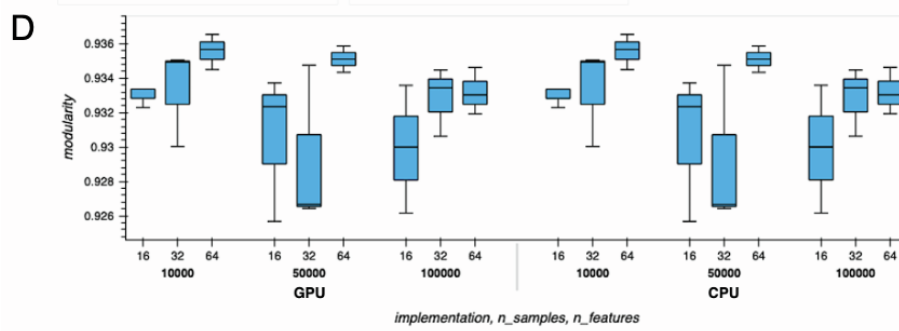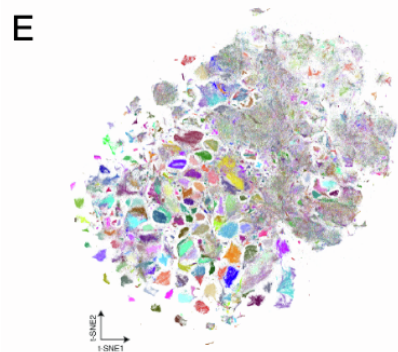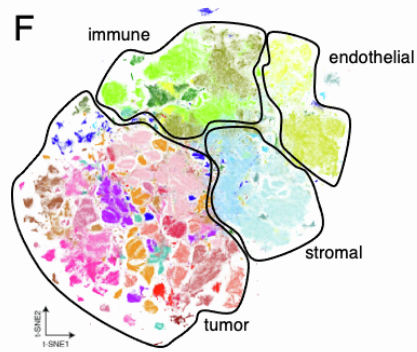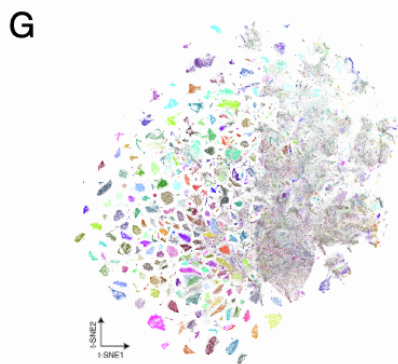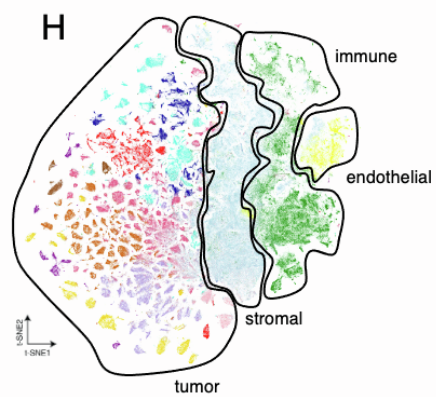

**Figure S3. Benchmarking single-cell phenotyping algorithms and implementations. Related to Figure 1, Figure 3, and STAR Methods.**

(A) Comparison of execution time between FlowSOM (Van Gassen et al., 2015) and our GPU implementation of PhenoGraph. Each boxplot represents the results from 5 replicate experiments using the indicated parameters. Lines in boxes indicate the medians and whiskers indicate data within  $1.5 \times$  interquartile range of the upper and lower quartiles. Outliers are shown as distinct points. (B) Benchmarking CPU and GPU implementations of PhenoGraph reveals no appreciable difference in quantitative endpoints between implementations. Scatter plots showing *t*-SNE embeddings of synthetic data, colored based on cluster label defined by either implementation. The modularity Q for each clustering result is shown above the plot. (C) Boxplot showing the distribution of GPU vs. CPU cluster purity for synthetic data. The line in the box indicates the median and whiskers indicate data within  $1.5 \times$  interquartile range of the upper and lower quartiles. The boxplot is compressed since most of the measurements were exactly or very near 1. Outliers are shown as distinct points. (D) Boxplots showing the distribution of clustering modularities for either implementation for the same synthetic data generated using the indicated number of samples and number of features. Lines in boxes indicate the medians and whiskers indicate data within  $1.5 \times$  interquartile range of the upper and lower quartiles. Outliers are shown as distinct points. Each boxplot represents the results from 5 replicate experiments using the indicated parameters. No significant difference was observed in modularity between implementations (ANOVA,  $P=0.999$ ). (E) For both OHSU and Basel cohorts, tumor cells differ more between samples than immune, stromal, or endothelial cells. The same *t*-SNE embedding of the OHSU dataset from Figure 1B, but with cells colored based on the unique tissue core from which they are derived. (F) The same *t*-SNE embedding of the OHSU dataset from Figure 1B, but with annotations indicating immune, stromal, endothelial, and tumor phenotypic regions. (G) A *t*-SNE embedding of the Basel dataset (Jackson et al., 2020) derived using the same parameters as were used for the OHSU *t*-SNE embedding, with cells colored based on the unique tissue core from which they are derived. (H) The same *t*-SNE embedding as in (G), but with annotations indicating immune, stromal, endothelial, and tumor phenotypic regions.

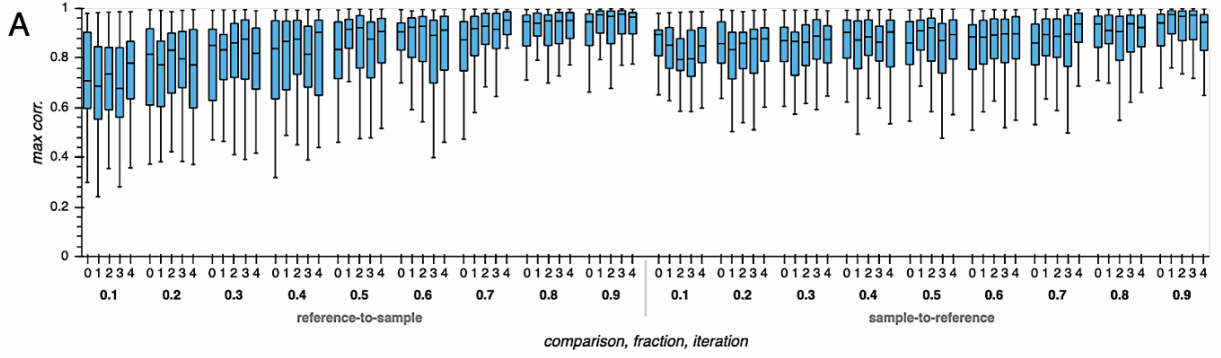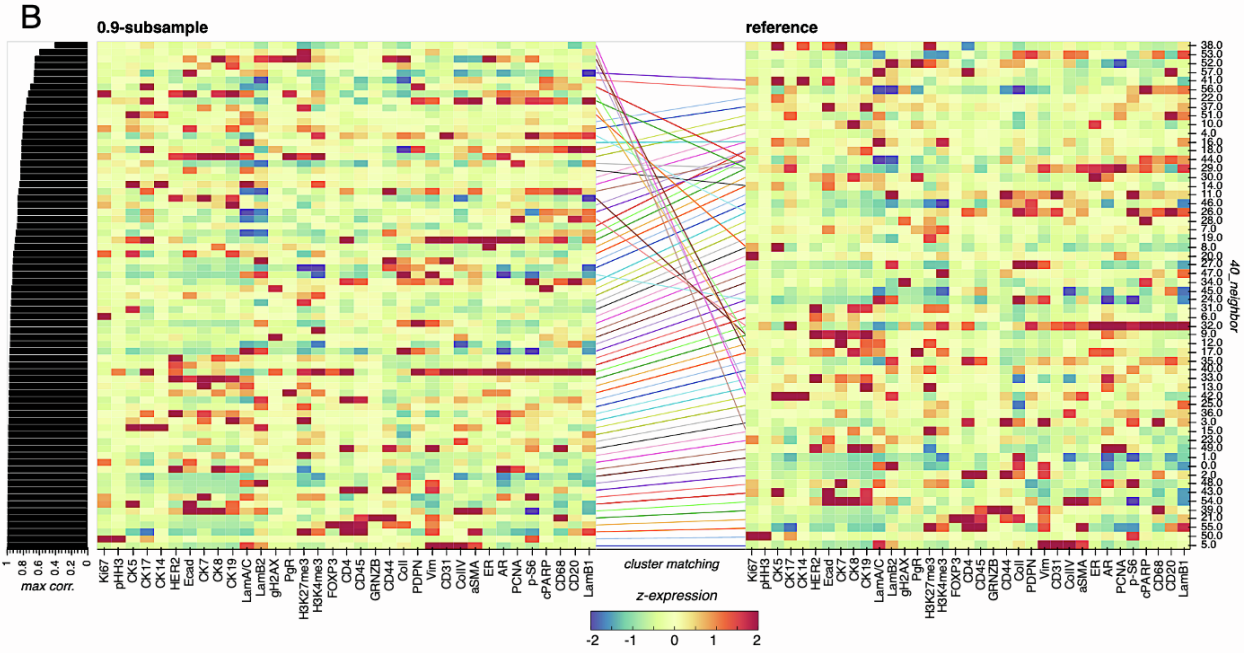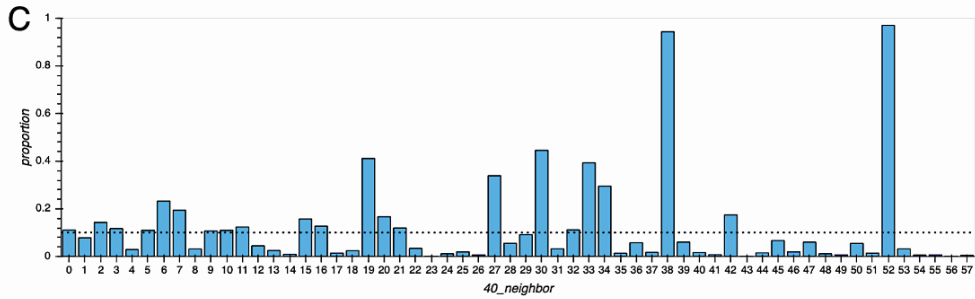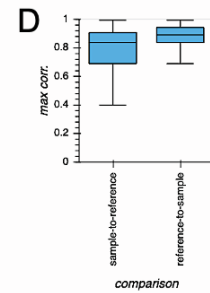

**Figure S4. BC cell phenotypes are robust against subsampling and noise. Related to Figure 1 and STAR Methods.**

(A) Maximum Pearson's correlations between full reference cell phenotypes and those derived using PhenoGraph on cells from a random fractional sample of TMA cores, iterated five times at each fraction level. Lines in boxes indicate the medians and whiskers indicate data within  $1.5 \times$  interquartile range of the upper and lower quartiles. (B) Phenotype matching between the full reference phenotypes and those derived from a 90%-subsampled fraction of TMA cores. Phenotypes are ordered by increasing matching correlation. Matching phenotypes are linked by a line, and lines are colored to discriminate between adjacent or overlapping links. 40\_neighbor represents the PhenoGraph cluster labels since we set  $k=40$  when defining the  $k$ -nearest neighbor graph in the PhenoGraph routine. The colorbar indicates z-scored marker expression. (C) The proportion of cells from each reference phenotype that correspond to the 10% of TMA cores held out from the 90%-subsampled fraction from (B). Unmatched phenotypes in the full reference correspond in part to cells from held-out cores. The dotted line marks the 10% threshold. (D) Maximum Pearson's correlation between full reference phenotypes and those derived using PhenoGraph on normalized mean intensities from all TMA cores, but with  $\pm 20\%$  random noise added to each marker in each core. Lines in boxes indicate the medians and whiskers indicate data within  $1.5 \times$  interquartile range of the upper and lower quartiles.



| Reference       | ME markers   |              |            |              |              |              |
|-----------------|--------------|--------------|------------|--------------|--------------|--------------|
| AR_Nuclei       | CK5_Ring     | FOXP3_Nuclei | CollV_Ring |              |              |              |
| aSMA_Ring       | CK14_Ring    | CD45_Ring    | CK7_Ring   | CK5_Ring     | CK19_Ring    |              |
| CD20_Ring       | CK14_Ring    | CK7_Ring     | CK5_Ring   | CK19_Ring    |              |              |
| CD31_Ring       | CK5_Ring     | CK19_Ring    | CK14_Ring  | CK7_Ring     | Ecad_Ring    |              |
| CD4_Ring        | CK19_Ring    | CK7_Ring     | CK14_Ring  | CK5_Ring     | Ecad_Ring    |              |
| CD44_Ring       | CK14_Ring    | CK7_Ring     | CK5_Ring   | CK19_Ring    | CD31_Ring    |              |
| CD45_Ring       | CK19_Ring    | CK7_Ring     | CK14_Ring  | CK5_Ring     | CK8_Ring     | CD31_Ring    |
| CD68_Ring       | CK19_Ring    | CK7_Ring     | CD31_Ring  | CK14_Ring    |              |              |
| CK14_Ring       | CD31_Ring    | CD68_Ring    | Vim_Ring   | aSMA_Ring    | CD20_Ring    | CD45_Ring    |
| CK17_Ring       | CD31_Ring    | CD68_Ring    | Vim_Ring   | Coll_Ring    | CD45_Ring    |              |
| CK5_Ring        | CD31_Ring    | CD68_Ring    | Vim_Ring   | CD4_Ring     | CD45_Ring    |              |
| CK19_Ring       | CD68_Ring    | CD4_Ring     | CD31_Ring  | CD45_Ring    |              |              |
| CK7_Ring        | CD68_Ring    | CD4_Ring     | CD31_Ring  | CD45_Ring    | FOXP3_Nuclei |              |
| CK8_Ring        | CD68_Ring    | CD4_Ring     | CD31_Ring  | CD45_Ring    |              |              |
| Coll_Ring       | CD45_Ring    | CK19_Ring    | CK7_Ring   | CK14_Ring    | CK5_Ring     |              |
| CollV_Ring      | CK19_Ring    | CK7_Ring     | CK14_Ring  | CK5_Ring     | CD68_Ring    | FOXP3_Nuclei |
| cPARP_Nuclei    | Ki67_Nuclei  | CK5_Ring     | CD31_Ring  | CD68_Ring    | CK14_Ring    |              |
| Ecad_Ring       | CD68_Ring    | CD4_Ring     | CD31_Ring  |              |              |              |
| ER_Nuclei       | CD68_Ring    | CD4_Ring     | CD31_Ring  | FOXP3_Nuclei |              |              |
| FOXP3_Nuclei    | CK19_Ring    | CK7_Ring     | CK5_Ring   | CK14_Ring    | CD31_Ring    | CK8_Ring     |
| gH2AX_Nuclei    | CK8_Ring     | CK14_Ring    | CK5_Ring   | CK7_Ring     |              |              |
| GRNZB_Ring      | CK19_Ring    | CK7_Ring     | CK5_Ring   | CD31_Ring    | CK14_Ring    | aSMA_Ring    |
| H3K27me3_Nuclei | CD31_Ring    | CD68_Ring    | CD44_Ring  |              |              |              |
| H3K4me3_Nuclei  | CD31_Ring    | CD68_Ring    | CD44_Ring  | CK19_Ring    |              |              |
| HER2_Ring       | CD68_Ring    | CD44_Ring    | CD31_Ring  | Vim_Ring     | CD4_Ring     |              |
| Ki67_Nuclei     | cPARP_Nuclei |              |            |              |              |              |
| LamA/C_Nuclei   | CD68_Ring    | CD44_Ring    | CK19_Ring  | CD45_Ring    |              |              |
| LamB1_Nuclei    | CD68_Ring    | CD44_Ring    | CK19_Ring  | CD45_Ring    | CK14_Ring    | CK7_Ring     |
| LamB2_Nuclei    | CD68_Ring    | CD44_Ring    | CK19_Ring  | CD31_Ring    | CK7_Ring     | CK14_Ring    |
| PCNA_Nuclei     | CK7_Ring     | CD45_Ring    | CD31_Ring  | CD68_Ring    | CK14_Ring    | LamB2_Nuclei |
| PDPN_Ring       | CK19_Ring    | CK7_Ring     | CK14_Ring  | CK5_Ring     | CD31_Ring    | CD68_Ring    |
| PgR_Nuclei      | CD68_Ring    | CD4_Ring     | CD31_Ring  | CD20_Ring    | aSMA_Ring    | Vim_Ring     |
| pHH3_Nuclei     | CD31_Ring    | CK5_Ring     | CK19_Ring  | CK14_Ring    | GRNZB_Ring   |              |
| p-S6_Ring       | CK19_Ring    | CK5_Ring     | CK7_Ring   | CK14_Ring    |              |              |
| Vim_Ring        | CK19_Ring    | CK7_Ring     | CD68_Ring  | CD45_Ring    | Ecad_Ring    |              |

**Table S1. Related to Figure 1 and Figure S2.** Putative reference and mutually-exclusive (ME) marker pairs used for RESTORE normalization of cell mean intensities. Each marker name indicates from which compartment its mean intensity was extracted. "Ring" indicates that a marker's intensity was extracted from the ring-shaped cytoplasmic segmentation masks derived by subtracting the "Nuclei" segmentation masks from "Cell" segmentation masks.
